# Supplementary material for: Interrogation of enhancer function by enhancer-targeting CRISPR epigenetic editing
Source: PubMed Central journal article supplement (PMC6981169; doi:10.1038/s41467-020-14362-5), 2020-01-24
Supplement: 41467_2020_14362_MOESM1_ESM.pdf [file 41467_2020_14362_MOESM1_ESM.pdf]

Supplementary Information

**Interrogation of Enhancer Function by Enhancer-Targeting  
CRISPR Epigenetic Editing**

Li and Liu et al.

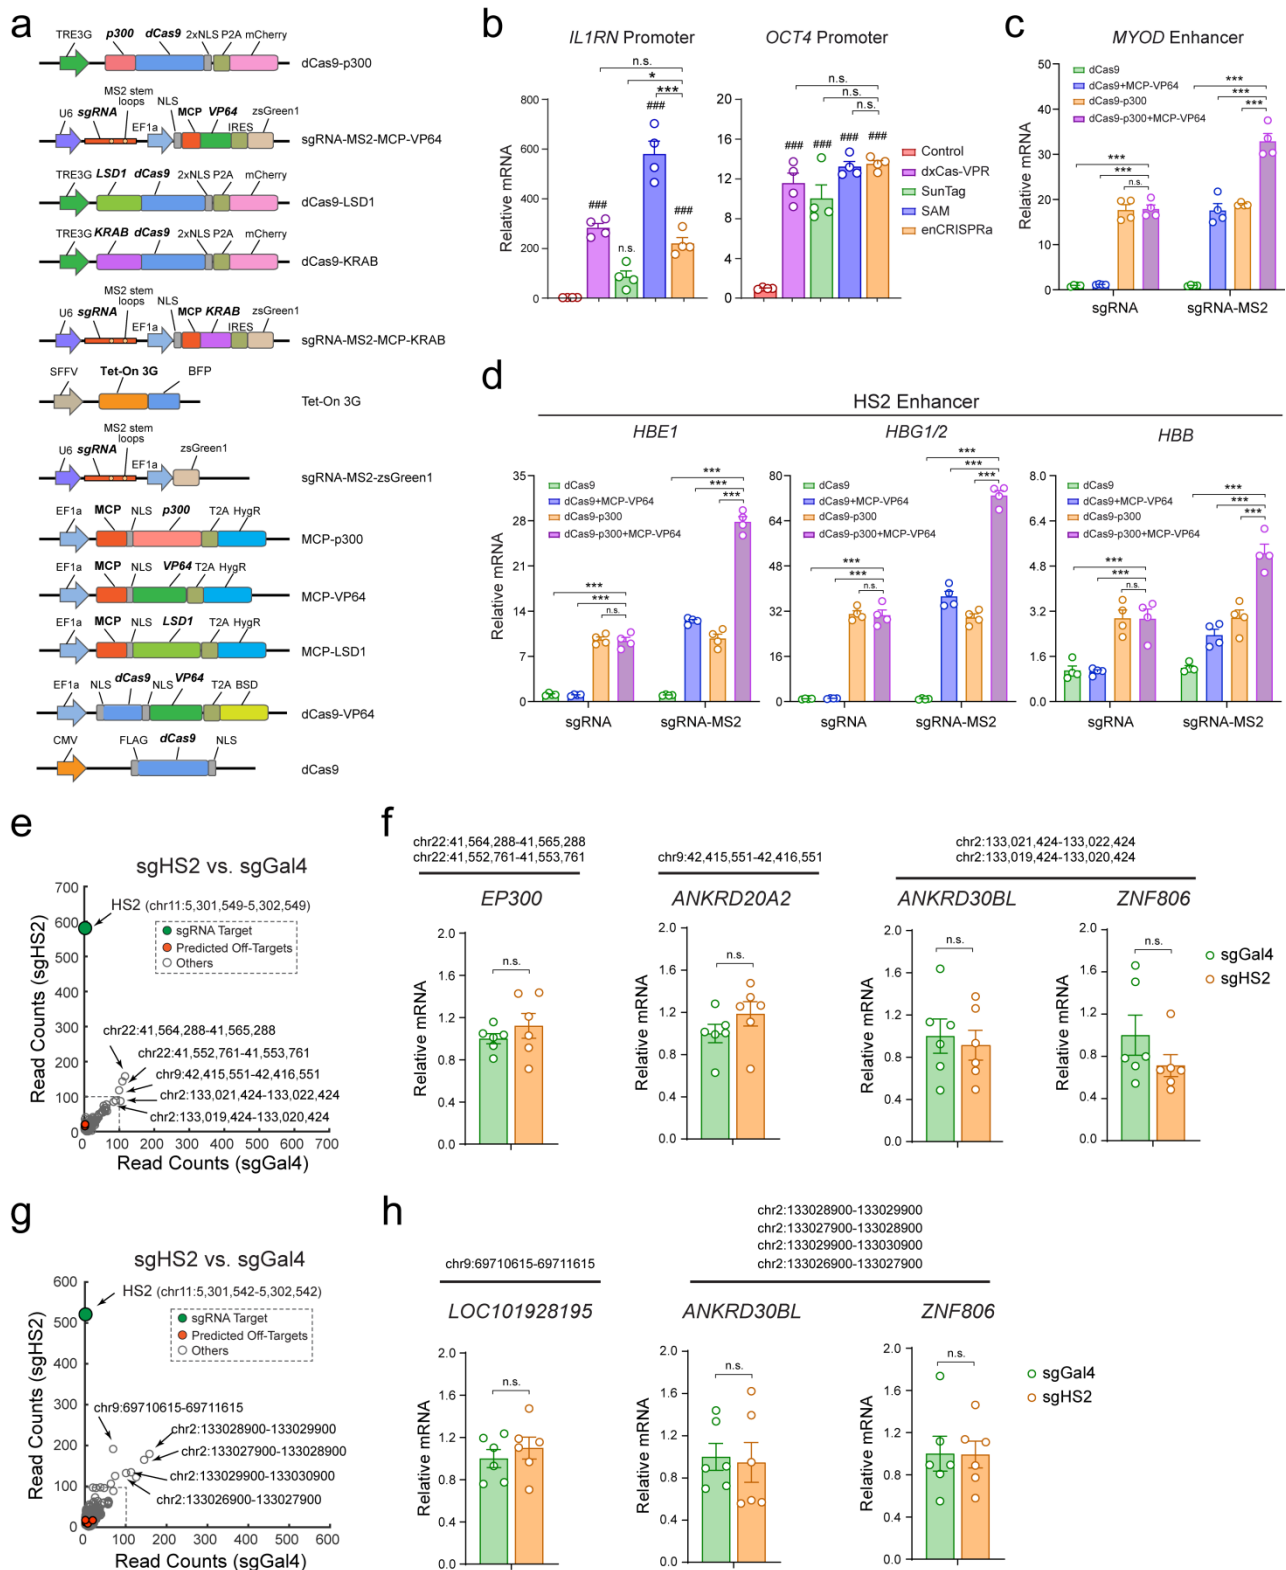

### Supplementary Figure 1. Evaluation of enCRISPRa in Target Gene Activation

(a) Schematic of the constructs used in this study.

(b) Expression of *IL1RN* and *OCT4* upon dxCas9-VPR, SunTag, SAM or enCRISPRa-mediated promoter activation in HEK293T cells. mRNA expression relative to non-transduced cells is shown as mean  $\pm$  SEM ( $N = 4$  experiments). The differences between control and dCas9 activators were analyzed by a one-way ANOVA. \* $P < 0.05$ , ## $P < 0.01$ , ### $P < 0.001$ .

0.001. The difference between enCRISPRa and other dCas9 activators were analyzed by a one-way ANOVA. \* $P < 0.05$ , \*\* $P < 0.01$ , \*\*\* $P < 0.001$ , n.s. not significant.

- (c) Expression of *MYOD* upon dCas9 alone, dCas9 + MCP-VP64, dCas9-p300, or dCas9-p300 + MCP-VP64 mediated enhancer activation together with the *MYOD* enhancer-targeting sgRNA with or with MS2 loops in HEK293T cells. Results are mean  $\pm$  SEM ( $N = 4$  experiments). The differences between different groups were analyzed by a two-way ANOVA. \*\*\* $P < 0.001$ , n.s. not significant.
- (d) Expression of *HBE1*, *HBG1/2* and *HBB* upon dCas9 alone, dCas9 + MCP-VP64, dCas9-p300, or dCas9-p300 + MCP-VP64 mediated enhancer activation with the HS2 enhancer-targeting sgRNA with or with MS2 in HEK293T cells. Results are mean  $\pm$  SEM ( $N = 4$  experiments) and analyzed by a two-way ANOVA. \*\*\* $P < 0.001$ , n.s. not significant.
- (e) Genome-wide analysis of dCas9 binding in HEK293T cells expressing sgHS2 or sgGal4. The same plot as Fig. 1f is shown except that the top 5 potential dCas9 off-targets are labeled.
- (f) Expression of the nearest neighbor genes of the top 5 potential dCas9 off-targets in HEK293T cells. Results are mean  $\pm$  SEM ( $N = 6$  experiments) and analyzed by a two-sided  $t$ -test. n.s. not significant.
- (g) Genome-wide analysis of dCas9 binding in K562 cells expressing sgHS2 or sgGal4. The same plot as Fig. 2d is shown except that the top 5 potential dCas9 off-targets are labeled.
- (h) Expression of the nearest neighbor genes of the top 5 potential dCas9 off-targets in K562 cells. Results are mean  $\pm$  SEM ( $N = 6$  experiments) and analyzed by a two-sided  $t$ -test. Source data are provided as a Source Data file.

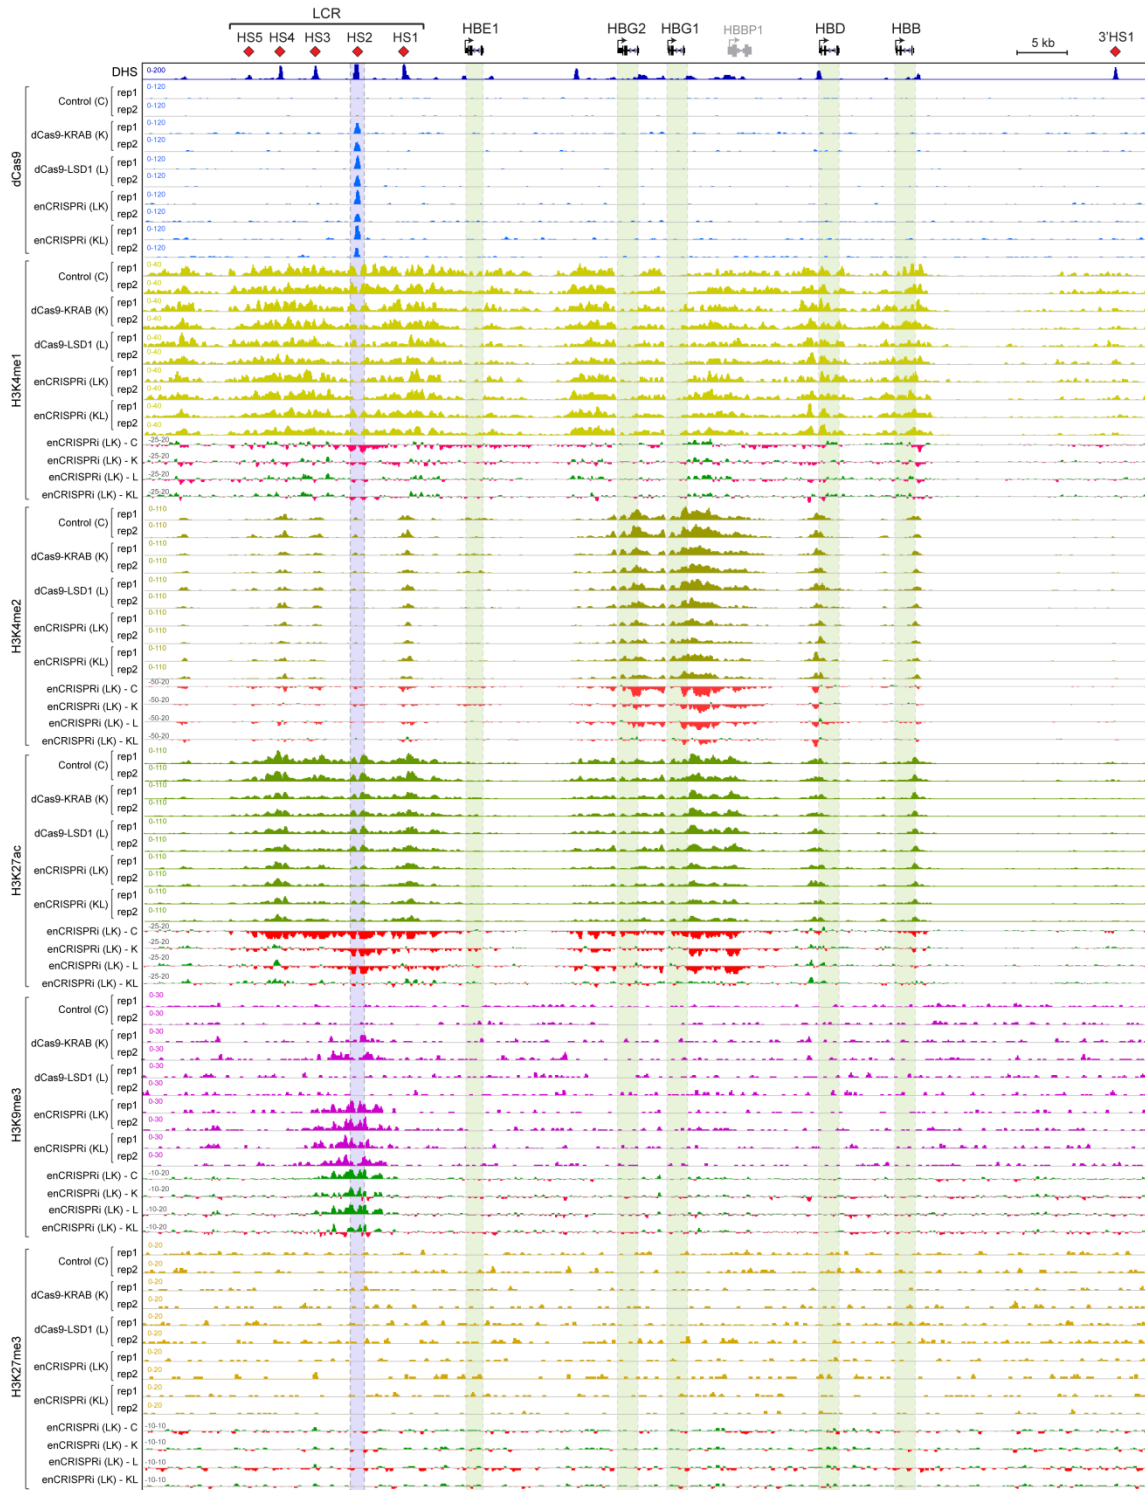

### Supplementary Figure 2. enCRISPRi Leads to Locus-Wide Epigenetic Reprogramming

Similar to Fig. 3, density maps are shown for ChIP-seq of dCas9, H3K4me1, H3K4me2, H3K27ac, H3K9me3 and H3K27me3 at the  $\beta$ -globin cluster (chr11: 5,222,500-5,323,700; hg19) in K562 cells co-expressing non-targeting sgGal4 (control or C) or sgHS2 with dCas9-KRAB (K), dCas9-LSD1 (L) or enCRISPRi (LK and KL). Regions showing increased or decreased ChIP-seq signals in enCRISPRi (LK) relative to control, dCas9-KRAB, dCas9-LSD1 or enCRISPRi (KL) (enCRISPRi – C, enCRISPRi – K, enCRISPRi – L, or enCRISPRi – KL) are depicted in *green* and *red*, respectively. Blue bars denote the sgRNA-targeted HS2 enhancer. Green bars denote the  $\beta$ -globin genes. Independent replicates (rep1 and rep2) are shown for all ChIP-seq experiments.

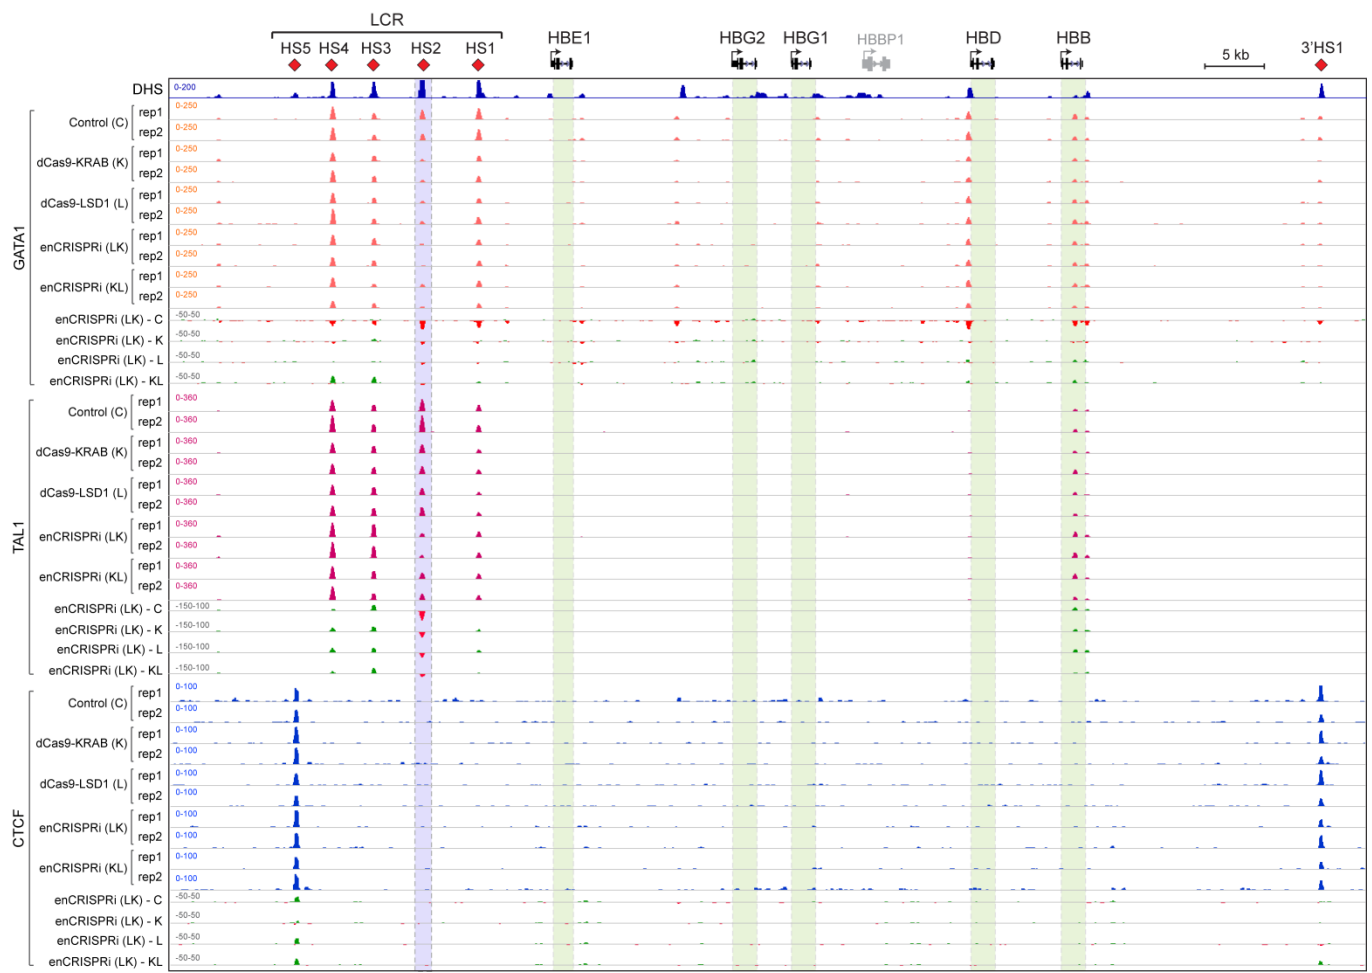

**Supplementary Figure 3. Targeting enCRISPRi to the  $\beta$ -Globin Gene Cluster Interferes with TF Binding**  
 Similar to Fig. 3, density maps are shown for ChIP-seq of GATA1, TAL1, and CTCF at the  $\beta$ -globin cluster (chr11: 5,222,500-5,323,700; hg19) in K562 cells. Independent ChIP-seq replicates (rep1 and rep2) are shown.

**a**

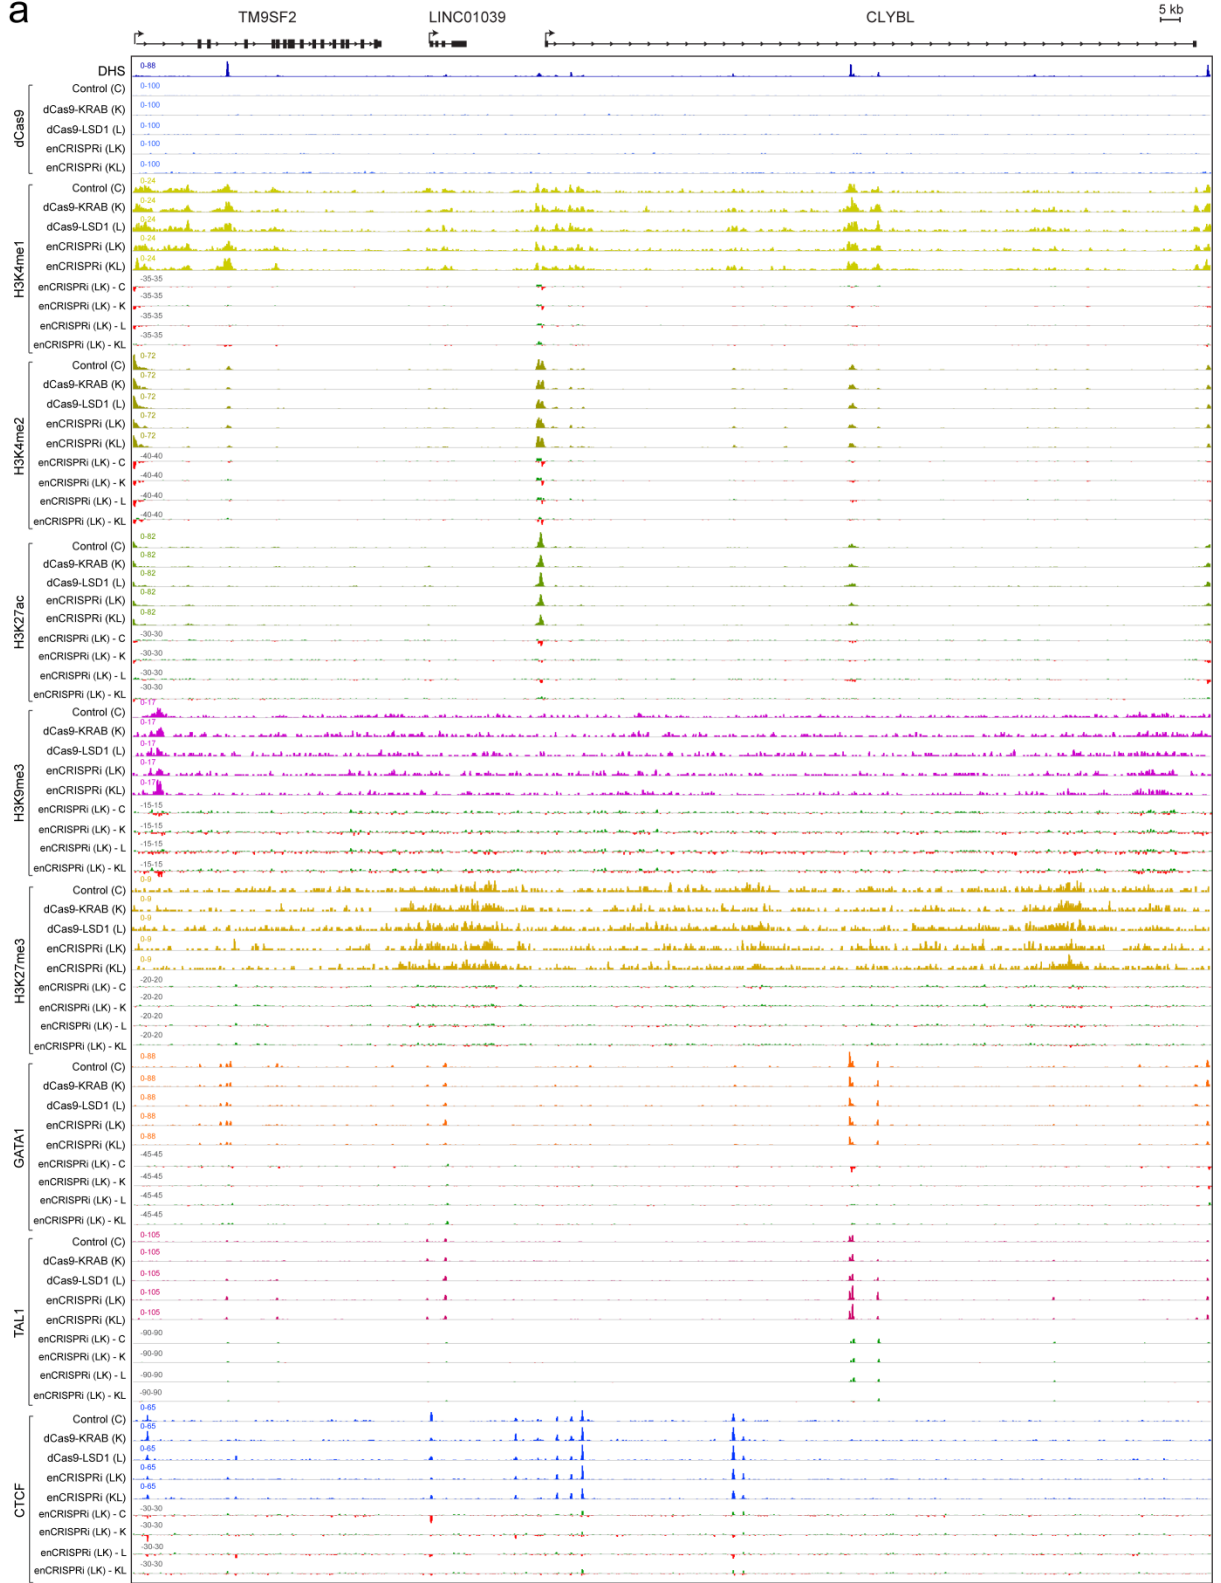

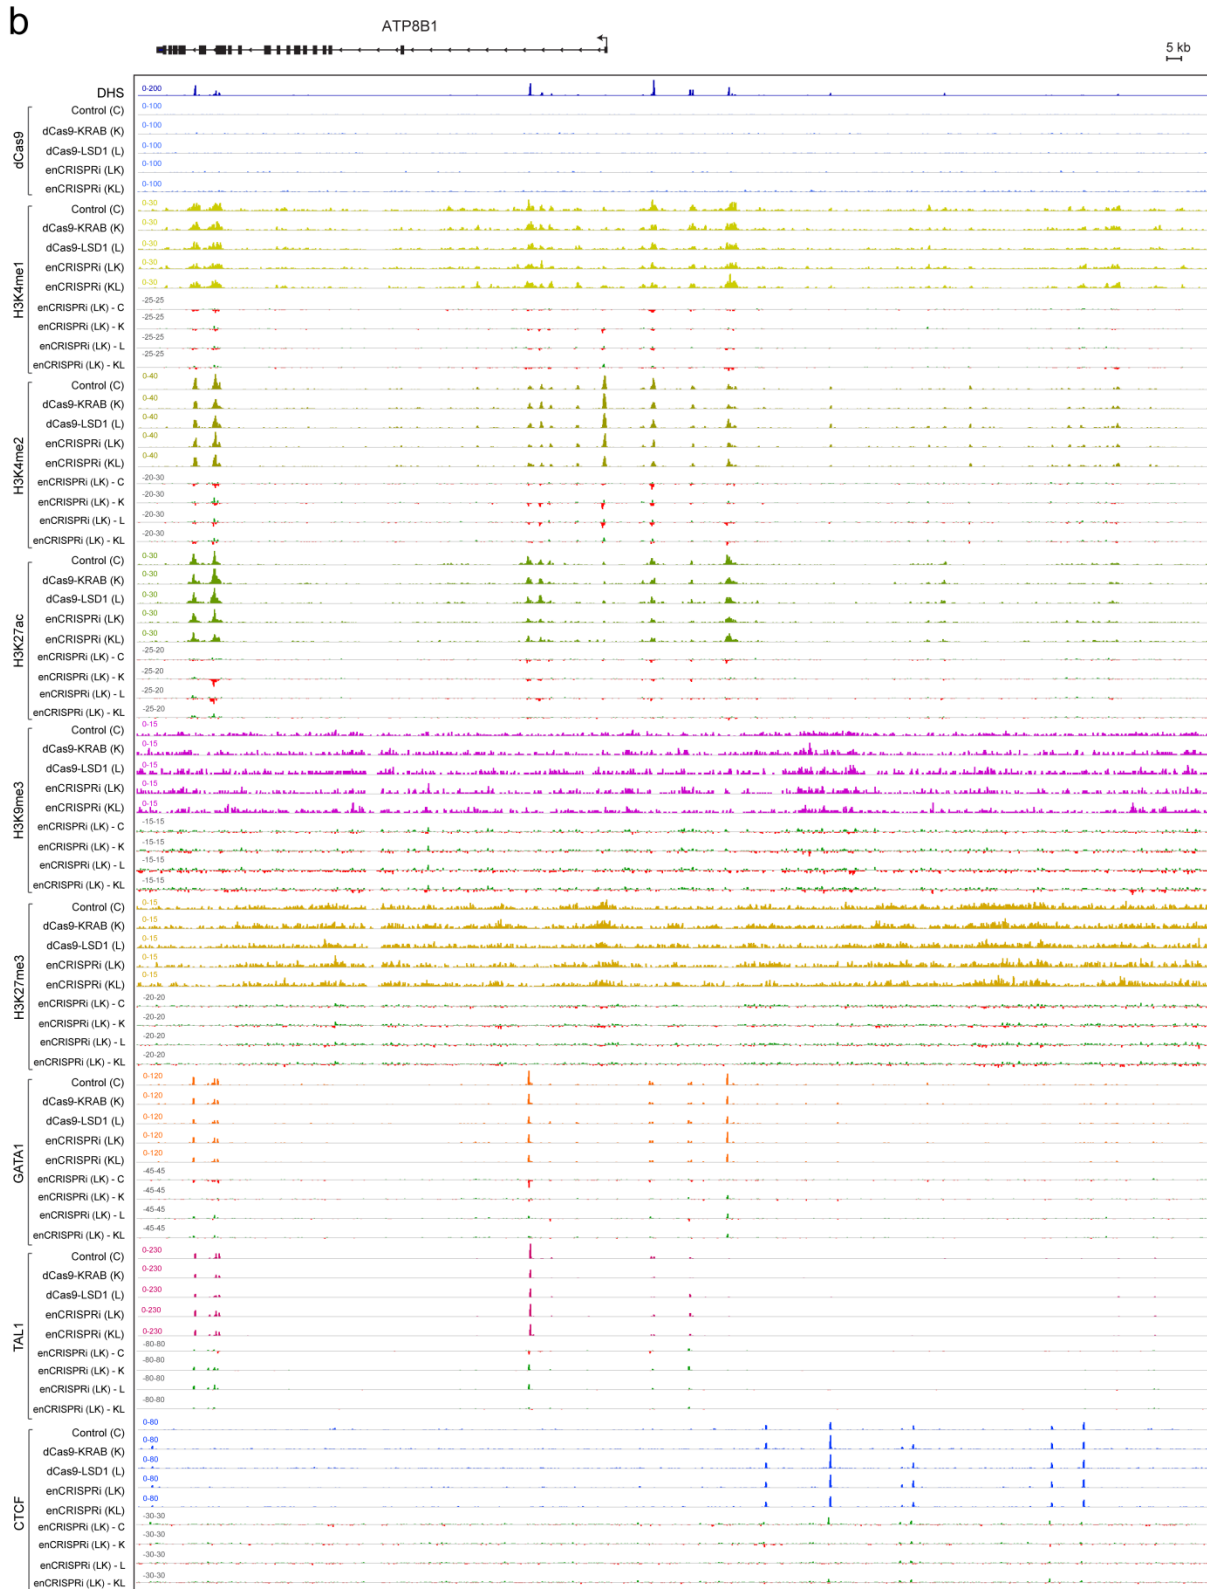

**Supplementary Figure 4. Representative Non-Targeted Genomic Loci Upon HS2-Targeted enCRISPRi**

- (a) Similar to Fig. 3, density maps are shown for ChIP-seq of dCas9, H3K4me1, H3K4me2, H3K27ac, H3K9me3, H3K27me3, GATA1, TAL1, and CTCF at the *TM9SF2-LINC01039-CLYBL* locus (chr13: 100,154,607-100,430,801; hg19) in K562 cells.
- (b) Similar to Fig. 3, density maps are shown for ChIP-seq of dCas9, H3K4me1, H3K4me2, H3K27ac, H3K9me3, H3K27me3, GATA1, TAL1, and CTCF at the *ATP8B1* locus (chr18: 55,292,001-55,668,879; hg19) in K562 cells.

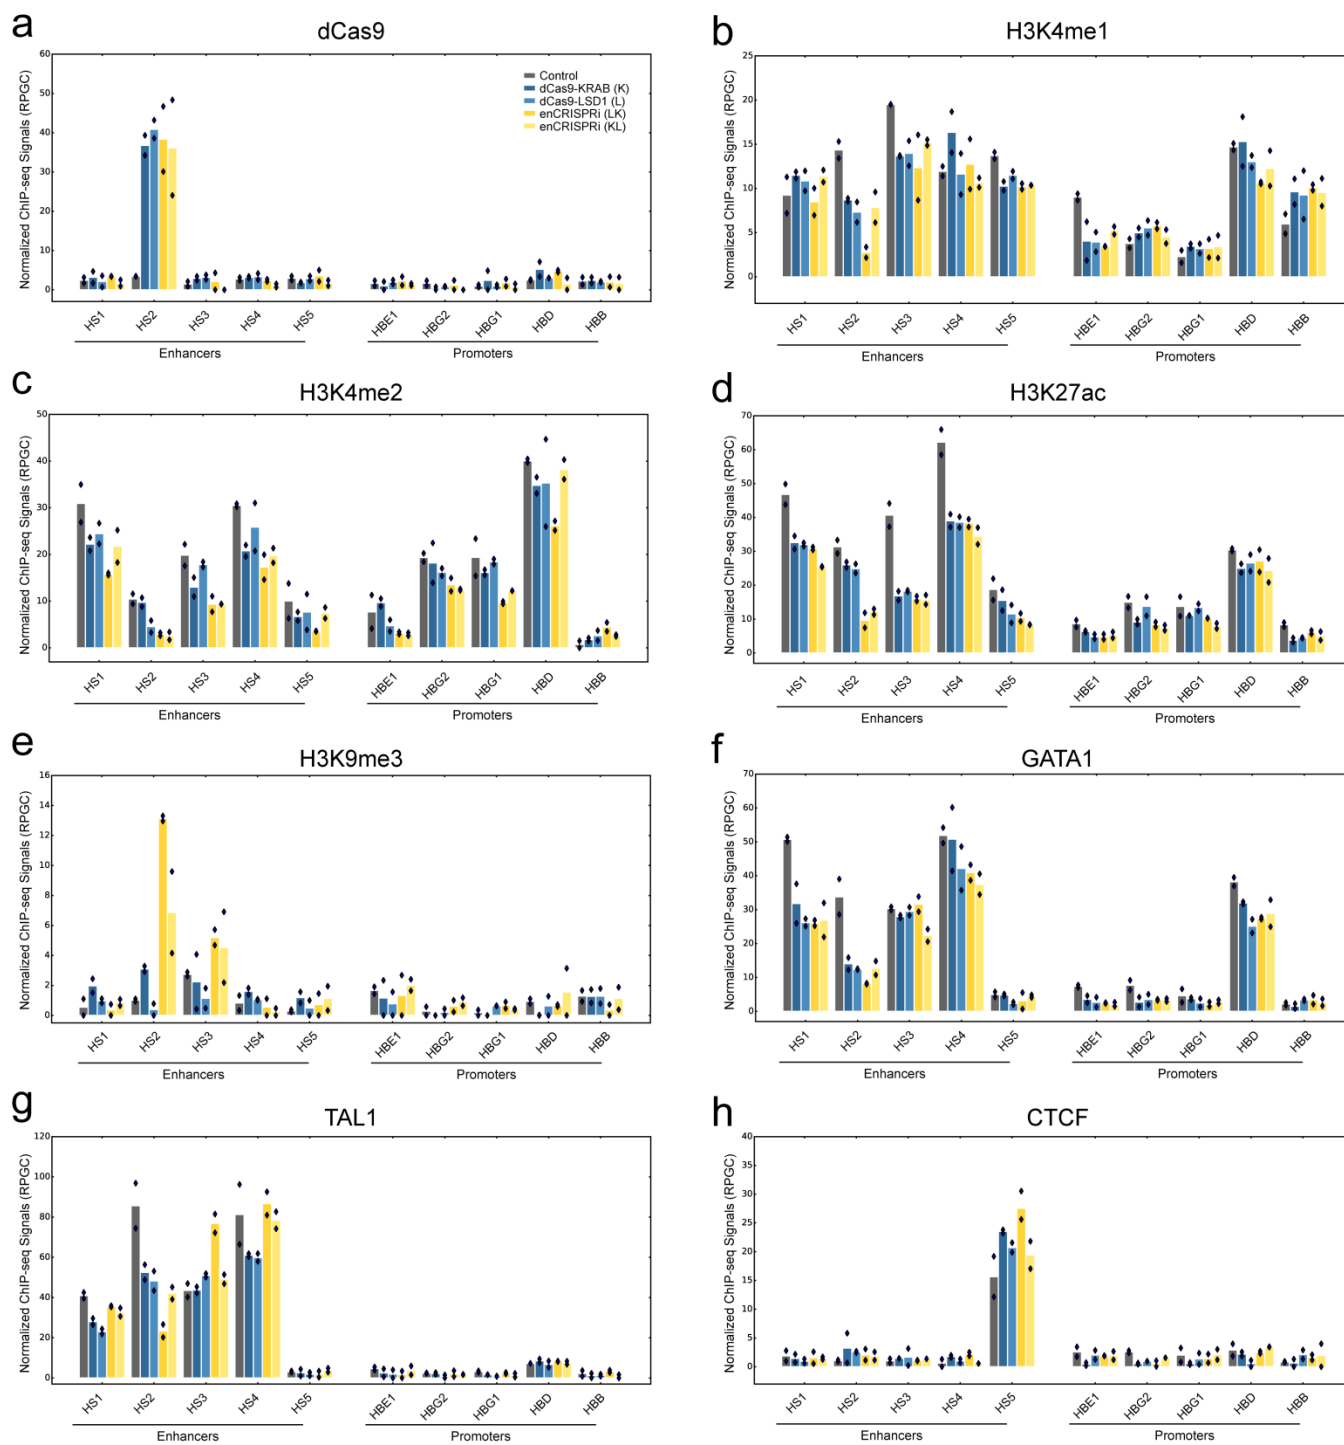

**Supplementary Figure 5. Analysis of ChIP-seq Signals at the  $\beta$ -Globin Enhancers and Promoters**

Bar graphs are shown for the normalized ChIP-seq signals as reads per genomic content (PRGC) at the  $\beta$ -globin enhancers (HS1 to HS5) and promoters (*HBE1*, *HBG2*, *HBG1*, *HBD* and *HBB*) for dCas9 (a), H3K4me1 (b), H3K4me2 (c), H3K27ac (d), H3K9me3 (e), GATA1 (f), TAL1 (g), and CTCF (h) in K562 cells co-expressing non-targeting sgGal4 (control) or sgHS2 with dCas9-KRAB (K), dCas9-LSD1 (L) or enCRISPRi (LK and KL). Dots indicate values from the independent ChIP-seq replicates (rep1 and rep2). Source data are provided as a Source Data file.



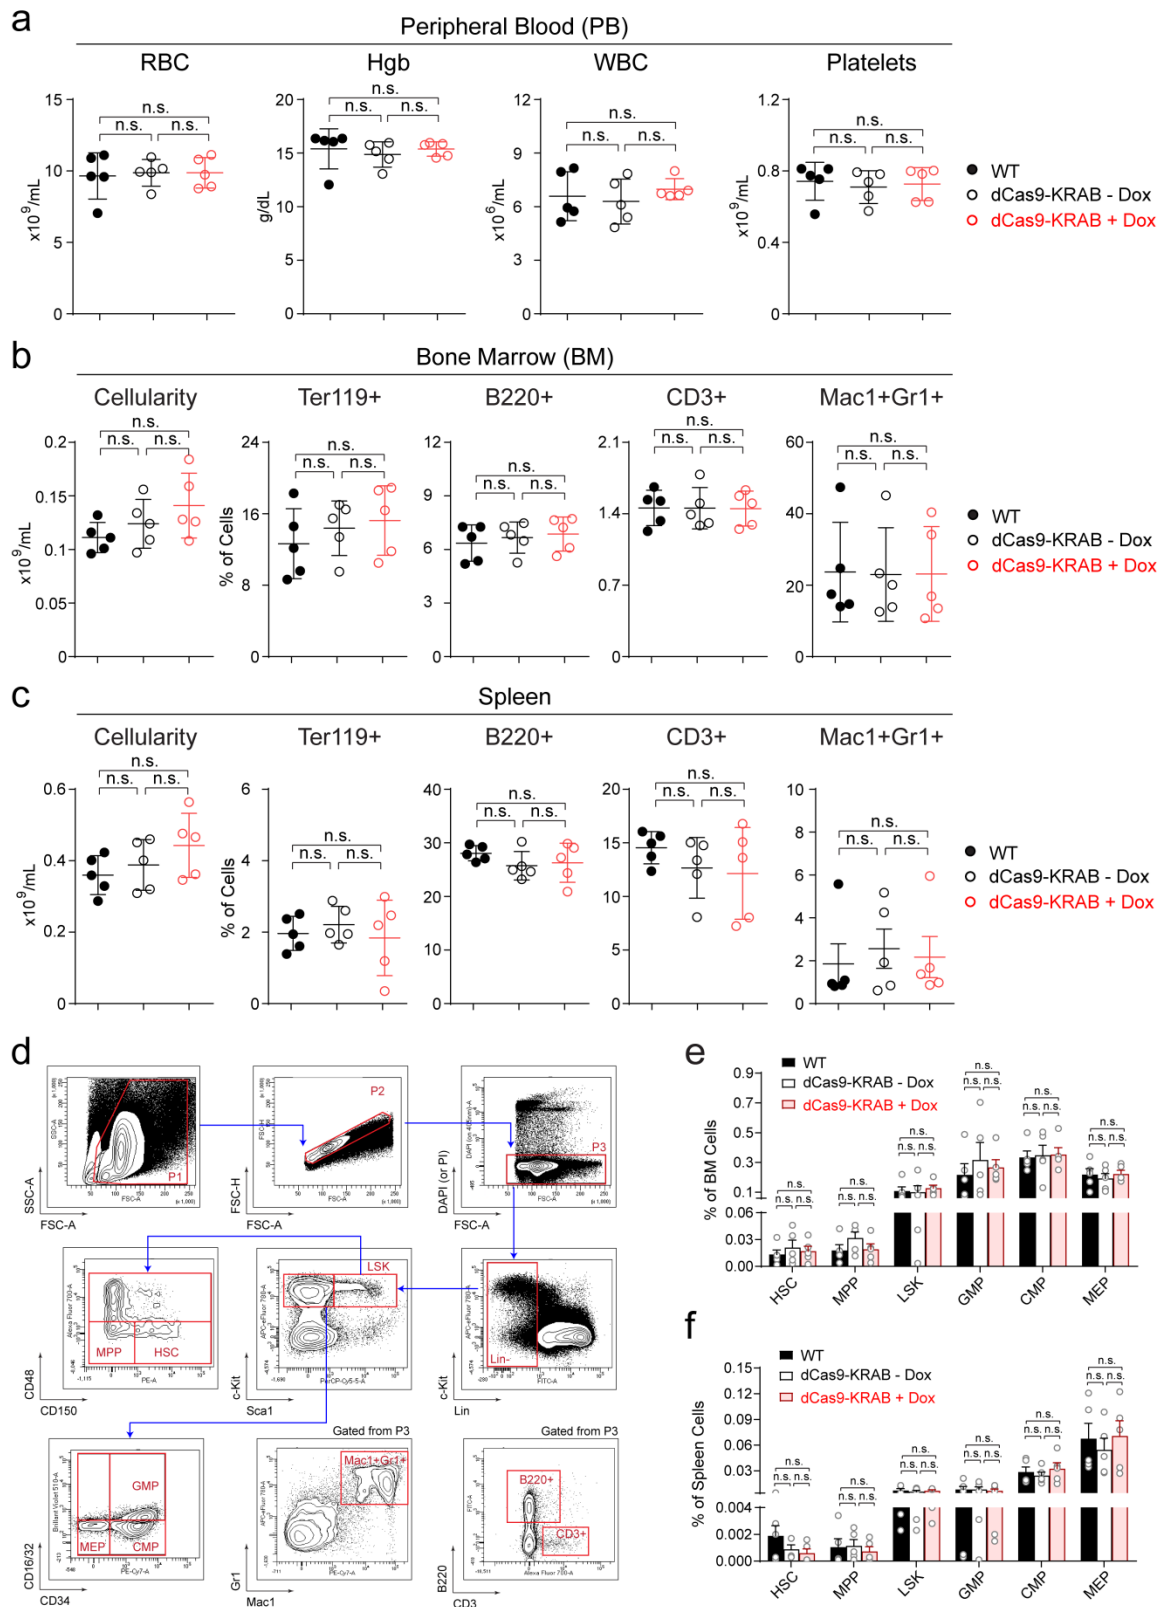

**Supplementary Figure 6. Inducible dCas9-KRAB Expression Has No Effect on Hematopoietic Differentiation**

(a) Complete blood count (CBC) of peripheral blood (PB) red blood cells (RBC), hemoglobin (Hgb), white blood cells (WBC) and platelets in mice 8 weeks after Dox treatment.  $N = 5$  mice per group. Results are mean  $\pm$  SD and analyzed by a repeated-measures one-way ANOVA with multiple comparisons. n.s. not significant.

- (b)** BM cellularity and frequencies of erythroid (Ter119<sup>+</sup>), B-lymphoid (B220<sup>+</sup>), T-lymphoid (CD3<sup>+</sup>) and myeloid (Mac1<sup>+</sup>Gr1<sup>+</sup>) cells in mice 8 weeks after Dox treatment.
- (c)** Spleen cellularity and frequencies of erythroid, B-lymphoid, T-lymphoid and myeloid cells 8 weeks after Dox treatment.
- (d)** Representative flow cytometry gates are shown for the analysis of various hematopoietic stem/progenitor cells (HSPCs) and mature lineages in mouse bone marrow.
- (e)** Frequencies of HSPCs in BM 8 weeks after Dox treatment. *N* = 5 mice per group. Results are mean ± SEM and analyzed by a two-way ANOVA with multiple comparisons. n.s. not significant.
- (f)** Frequencies of HSPCs in spleen 8 weeks after Dox treatment. *N* = 5 mice per group. Source data are provided as a Source Data file.

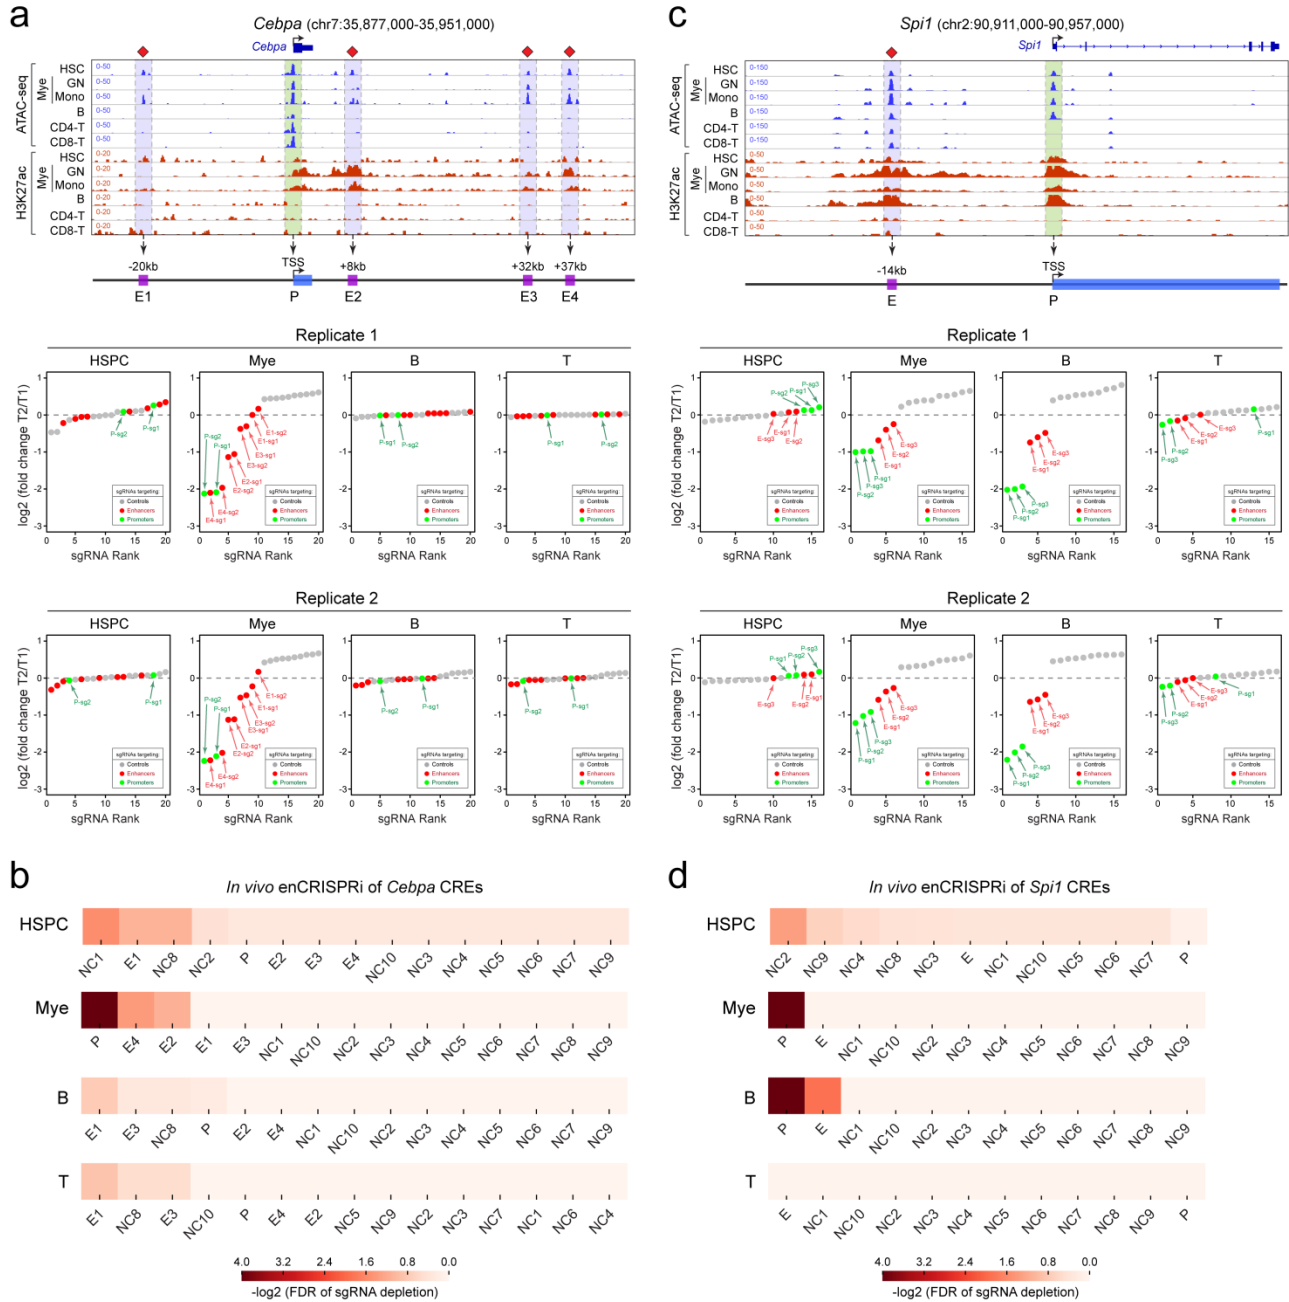

### Supplementary Figure 7. Locus-Specific Enhancer Perturbation at *Cebpa* and *Spi1* Loci

- (a) *In vivo* enCRISPRi perturbation of *Cebpa* CREs during hematopoiesis. Similar to Fig. 5e, waterfall plots are shown for target-specific sgRNAs (green and red dots) and non-targeting control sgRNAs (grey dots) by the normalized  $\log_2$  fold changes in HSPCs, myeloid, T or B cells 16-weeks post-BMT (T2) relative to pooled sgRNA-transduced HSPCs (T1) in two independent replicate screens ( $N = 3$  recipient mice per screen). The annotated *Cebpa* promoter (P) and enhancers (E1 to E4) are indicated by green and blue shaded lines.
- (b) Ranking of the top depleted *Cebpa* CREs by the  $-\log_2$  (FDR of sgRNA depletion). The significance (FDR) of depletion for each targeted enhancer, promoter or non-targeting control (NC) region in each cell type was calculated using the MAGECK test. P, promoter; E, enhancer; NC, non-targeting control.
- (c) *In vivo* enCRISPRi perturbation of *Spi1* CREs during hematopoiesis. Similar to Fig. 5f, waterfall plots are shown for two independent replicate screens ( $N = 3$  recipient mice per screen). The annotated *Spi1* promoter (P) and enhancer (E) are indicated by green and blue shaded lines.
- (d) Ranking of the top depleted *Spi1* CREs by the  $-\log_2$  (FDR of sgRNA depletion).

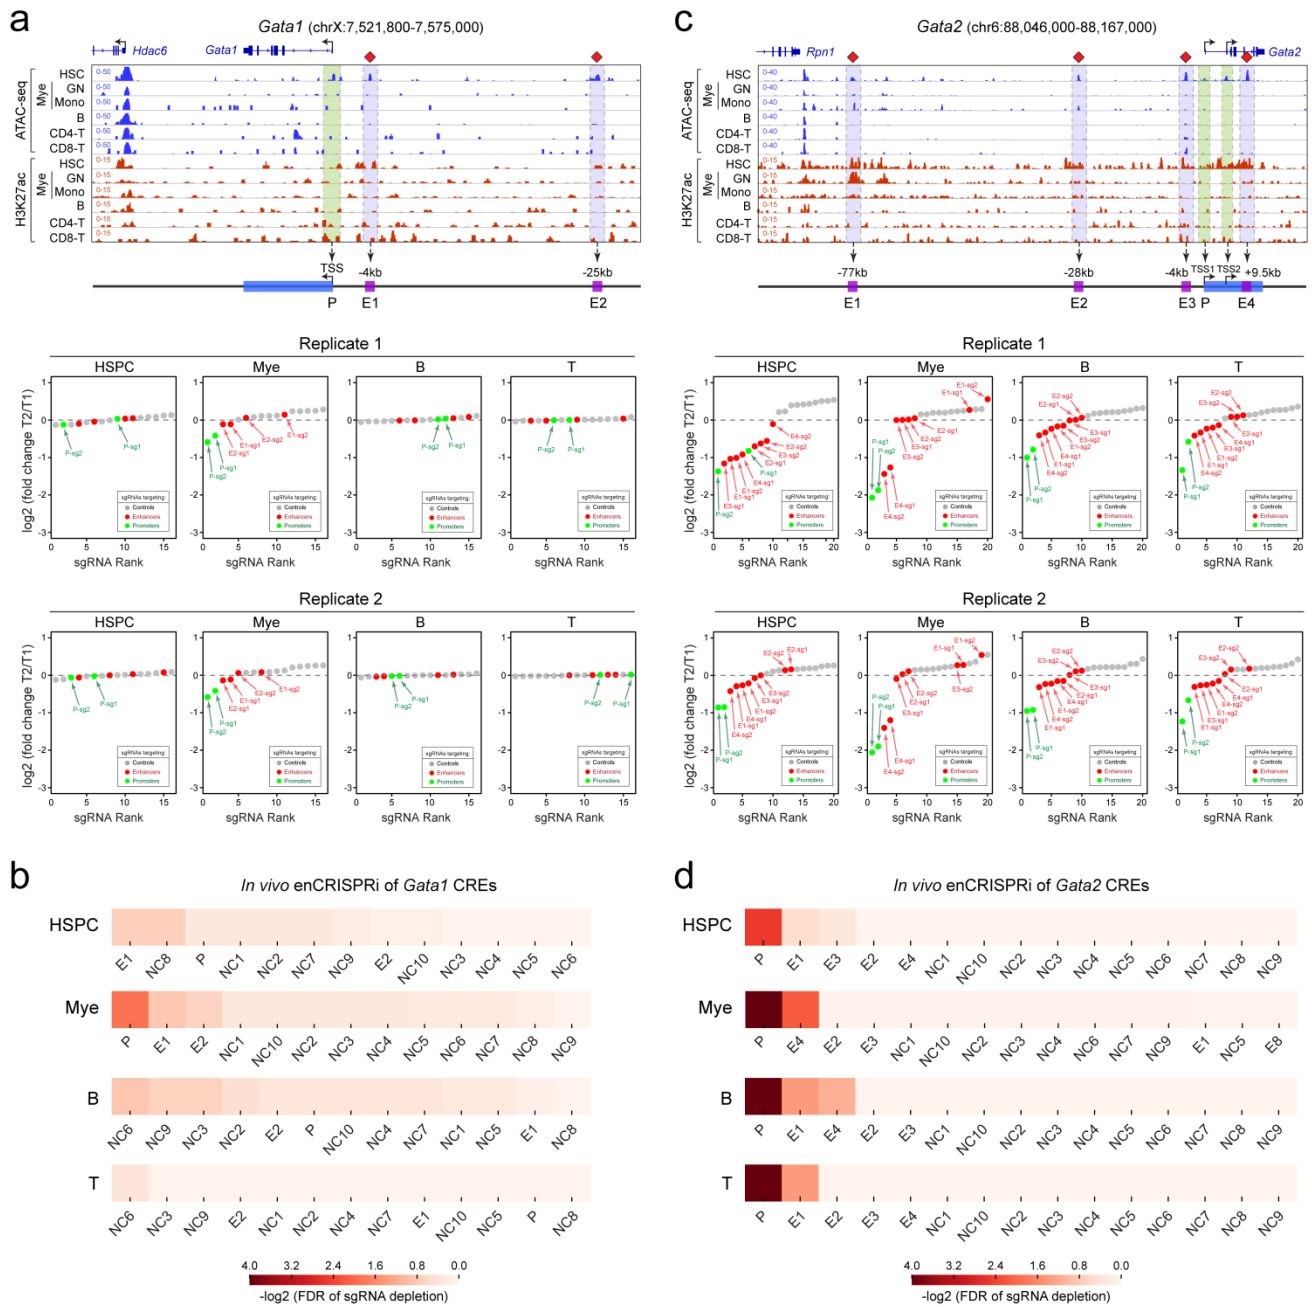

### Supplementary Figure 8. Locus-Specific Enhancer Perturbation at *Gata1* and *Gata2* Loci

- (a) *In vivo* enCRISPRi perturbation of *Gata1* CREs during hematopoiesis. Density maps are shown for ATAC-seq and H3K27ac ChIP-seq at the *Gata1* locus (chrX:7,521,800-7,575,000; mm9) in bone marrow HSC, granulocytes (GN), monocytes (Mono), B, CD4<sup>+</sup> and CD8<sup>+</sup> T cells, respectively. Waterfall plots are shown for target-specific sgRNAs (green and red dots) and non-targeting control sgRNAs (grey dots) by the normalized log<sub>2</sub> fold changes in HSPCs, myeloid, T or B cells 16-weeks post-BMT (T2) relative to pooled sgRNA-transduced HSPCs (T1) in two independent replicate screens (*N* = 3 recipient mice per screen). The annotated *Gata1* promoter (P) and enhancers (E1 and E2) are indicated by green and blue shaded lines.
- (b) Ranking of the top depleted *Gata1* CREs by the  $-\log_2$  (FDR of sgRNA depletion). The significance (FDR) of depletion for each targeted enhancer, promoter or non-targeting control (NC) region in each cell type was calculated using the MAGECK test. P, promoter; E, enhancer; NC, non-targeting control.
- (c) *In vivo* enCRISPRi perturbation of *Gata2* CREs during hematopoiesis. Density maps are shown for ATAC-seq and H3K27ac ChIP-seq at the *Gata2* locus (chr6:88,046,000-88,167,000; mm9) in bone marrow HSC, GN, Mono, B, CD4<sup>+</sup> and CD8<sup>+</sup> T cells, respectively. Waterfall plots are shown for two independent replicate screens (*N* = 3 recipient mice per screen). The annotated *Gata2* promoter (P) and enhancers (E1 to E4) are indicated by green and blue shaded lines.
- (d) Ranking of the top depleted *Gata2* CREs by the  $-\log_2$  (FDR of sgRNA depletion).

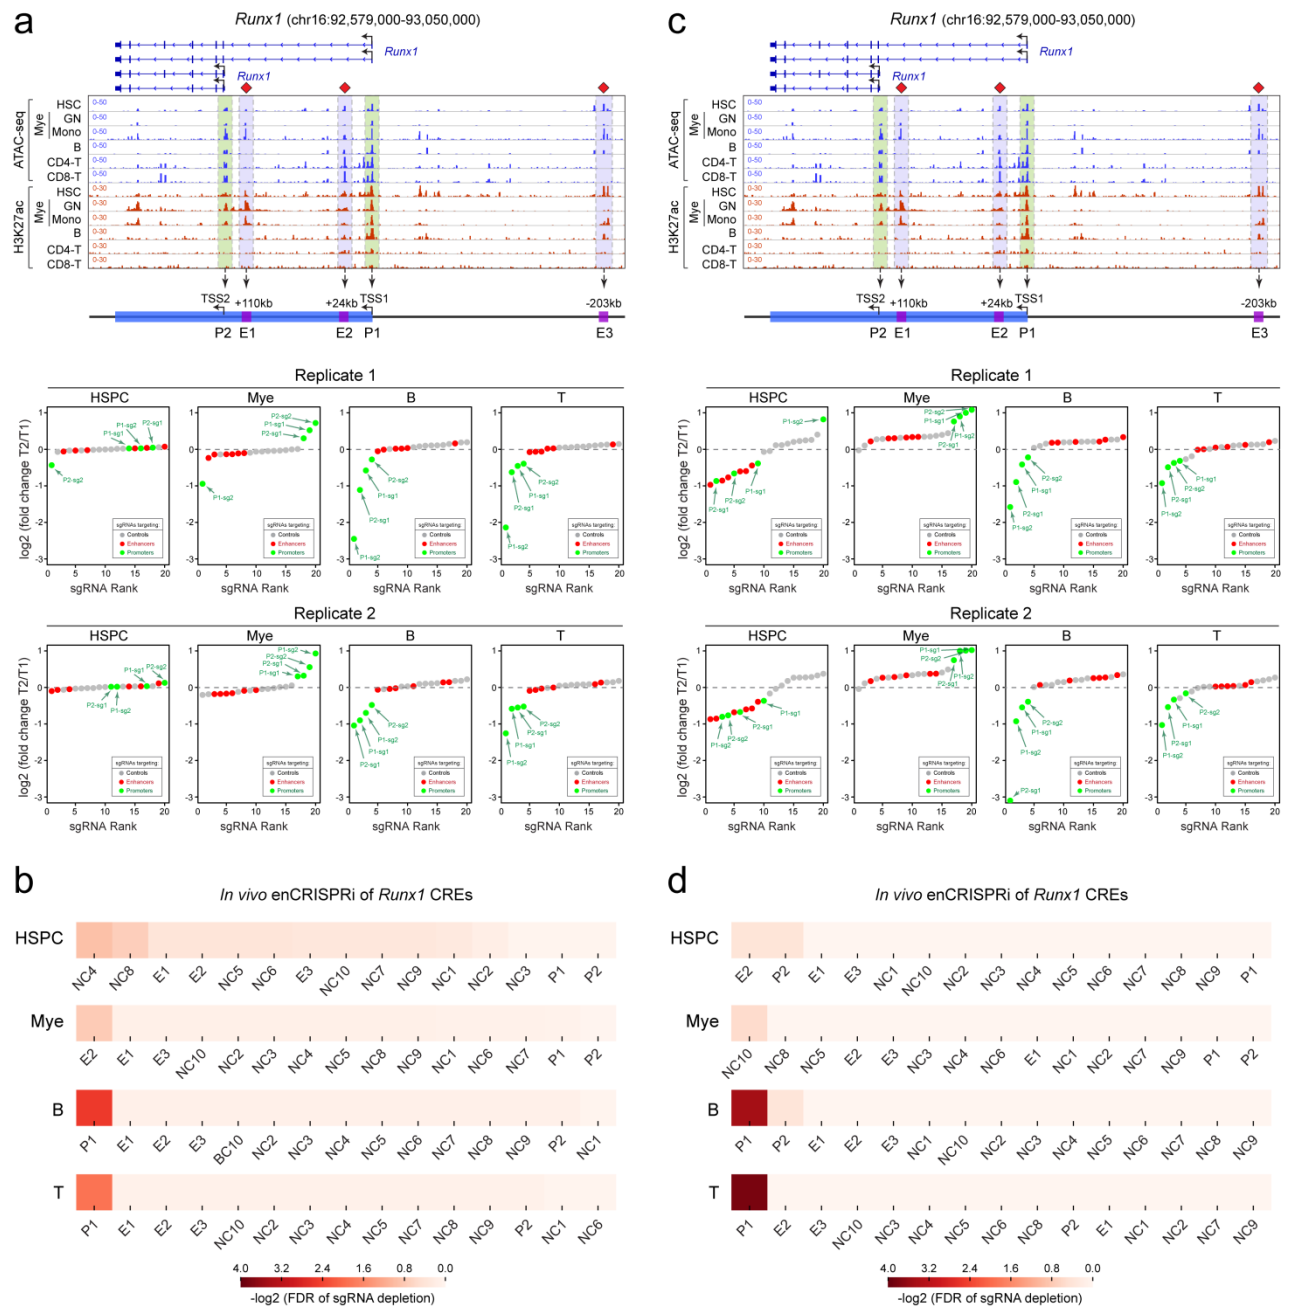

**Supplementary Figure 9. Locus-Specific and Multi-Loci Perturbations of *Runx1* CREs**

- (a) *In vivo* enCRISPRi perturbation of *Runx1* CREs by locus-specific enCRISPRi screen during hematopoiesis. Similar to Fig. 6c, waterfall plots are shown for two independent replicate screens ( $N = 3$  recipient mice per screen). The annotated *Runx1* promoters (P1 and P2) and enhancers (E1 to E3) are indicated by green and blue shaded lines.
- (b) Ranking of the top depleted *Runx1* CREs by the  $-\log_2$  (FDR of sgRNA depletion) by locus-specific enCRISPRi screen. The significance (FDR) of depletion for each targeted enhancer, promoter or non-targeting control (NC) region in each cell type was calculated using the MAGECK test. P, promoter; E, enhancer; NC, non-targeting control.
- (c) *In vivo* enCRISPRi perturbation of *Runx1* CREs by multi-loci enCRISPRi screen during hematopoiesis. Similar to Fig. 6d, waterfall plots are shown for two independent replicate screens ( $N = 3$  recipient mice per experiment).
- (d) Ranking of the top depleted *Runx1* CREs by the  $-\log_2$  (FDR of sgRNA depletion) in the multi-loci enCRISPRi screen.

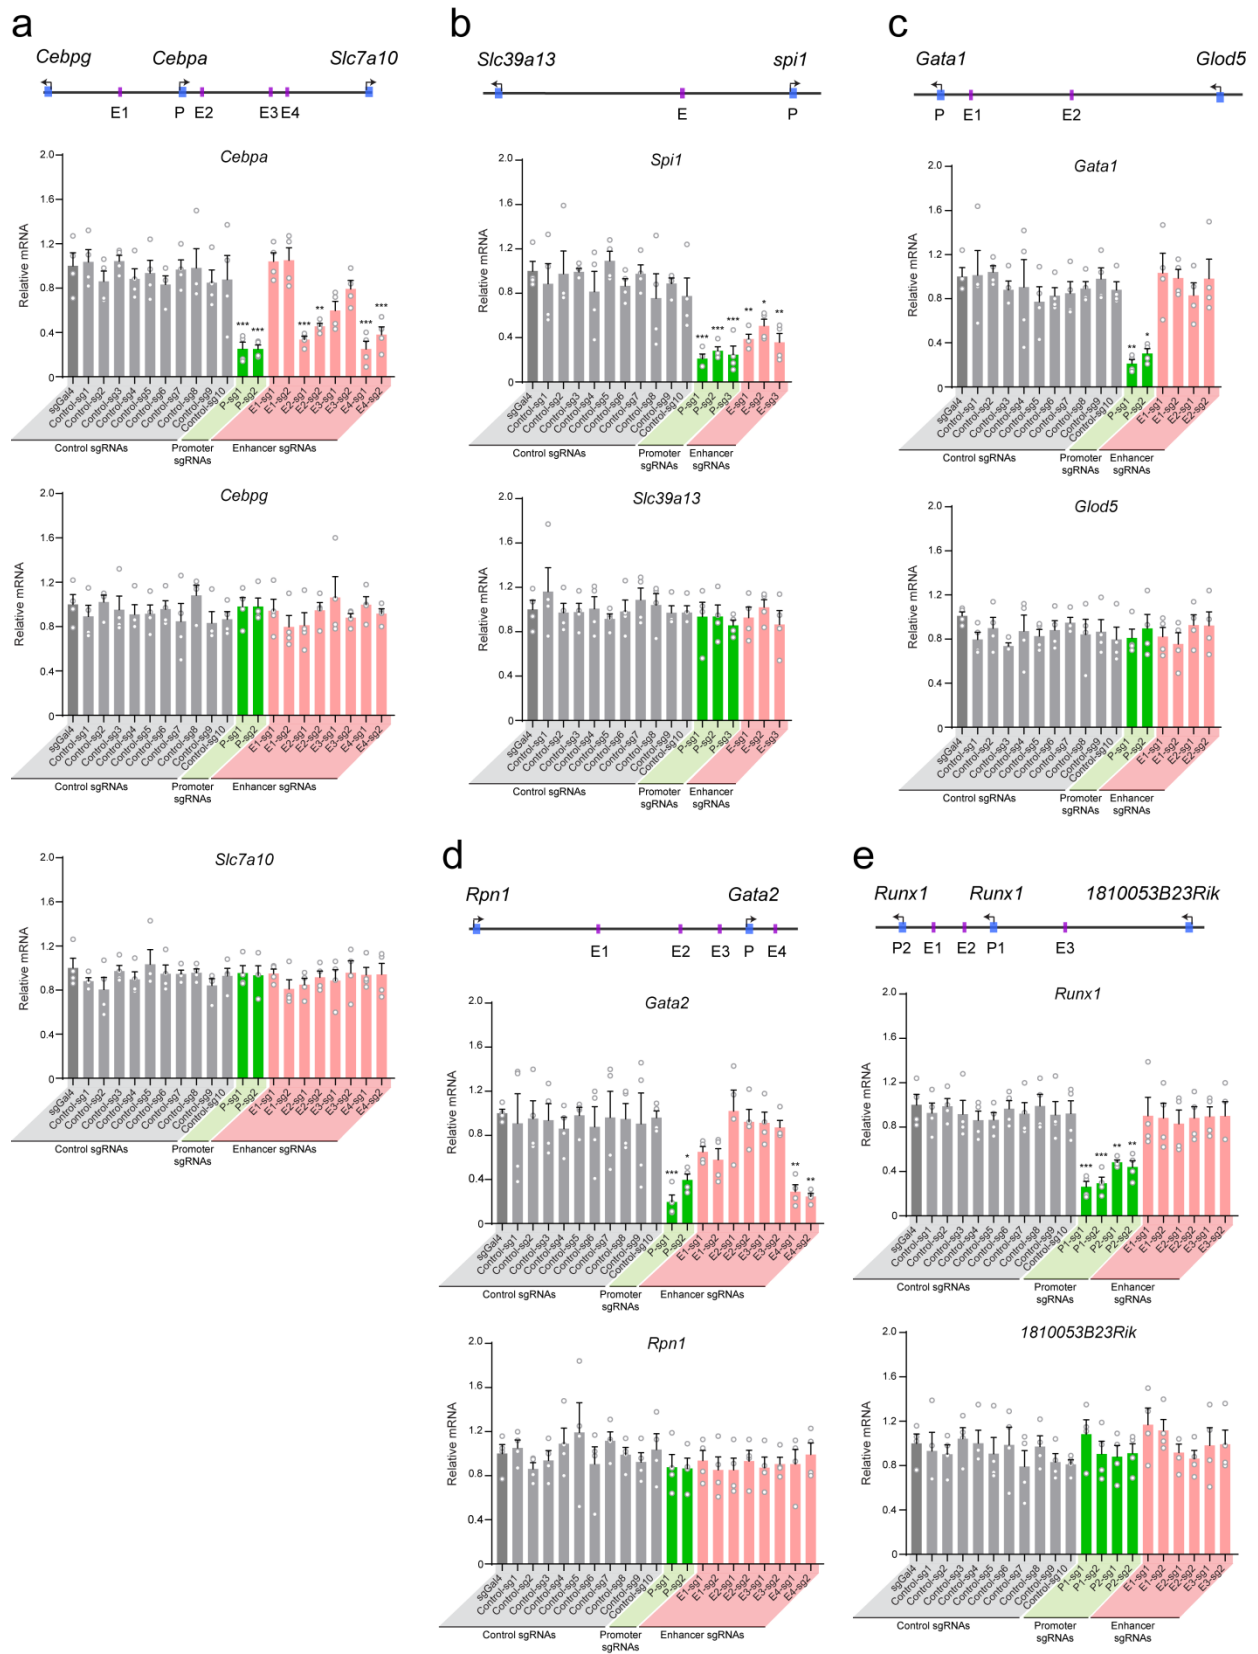

**Supplementary Figure 10. In Vivo enCRISPRi of Promoters and Enhancers Impairs Target Gene Expression**

(a) enCRISPRi-mediated perturbation of *Cebpa* CREs impaired the mRNA expression of *Cebpa* but not the other nearby genes in BM HSPCs. Independent sgRNAs (sg1 and sg2) for each targeted enhancer or promoter are shown. Cells

transduced with non-targeting sgGal4 were analyzed as the control. Results are mean  $\pm$  SEM and analyzed by a one-way ANOVA. \* $P < 0.05$ , \*\* $P < 0.01$ , \*\*\* $P < 0.001$ , n.s. not significant.

- (b) Expression of *Spi1* and the nearby gene upon enCRISPRi-mediated perturbation of CREs in HSPCs.
- (c) Expression of *Gata1* and the nearby gene upon enCRISPRi-mediated perturbation of CREs in HSPCs.
- (d) Expression of *Gata2* and the nearby gene upon enCRISPRi-mediated perturbation of CREs in HSPCs.
- (e) Expression of *Runx1* and the nearby gene upon enCRISPRi-mediated perturbation of CREs in HSPCs. Source data are provided as a Source Data file.



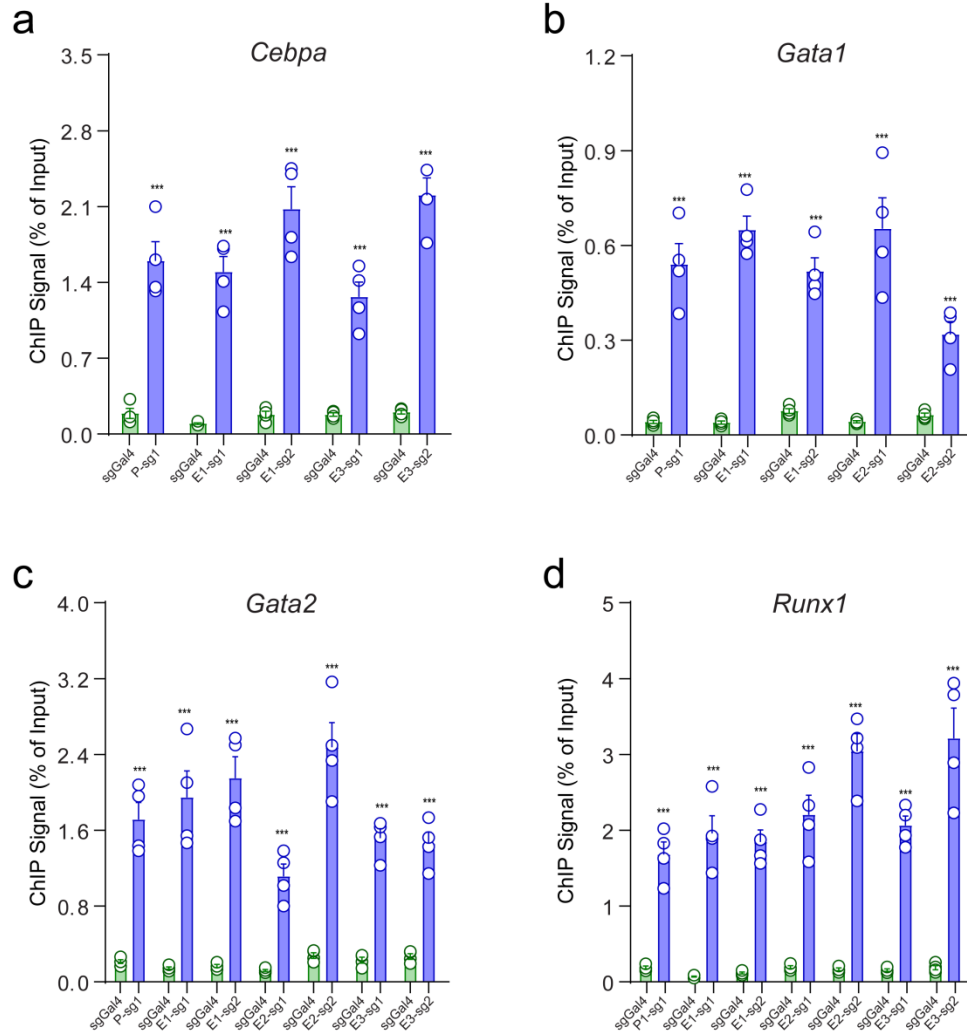

**Supplementary Figure 11. Chromatin Occupancy of dCas9 in enCRISPRi-Expressing HSPCs**

- (a) ChIP-qPCR analysis of dCas9 occupancy in the presence of non-targeting sgRNA (sgGal4) or sgRNAs targeting *Cebpa* promoter or enhancers in BM HSPCs. Independent sgRNAs (sg1 and sg2) for each targeted enhancer or promoter are shown. Results are mean  $\pm$  SEM and analyzed by a two-sided *t*-test. \* $P < 0.05$ , \*\* $P < 0.01$ , \*\*\* $P < 0.001$ .
- (b) ChIP-qPCR analysis of dCas9 occupancy for sgRNAs targeting *Gata1* promoter or enhancers in HSPCs.
- (c) ChIP-qPCR analysis of dCas9 occupancy for sgRNAs targeting *Gata2* promoter or enhancers in HSPCs.
- (d) ChIP-qPCR analysis of dCas9 occupancy for sgRNAs targeting *Runx1* promoter or enhancers in HSPCs. Source data are provided as a Source Data file.



**a**

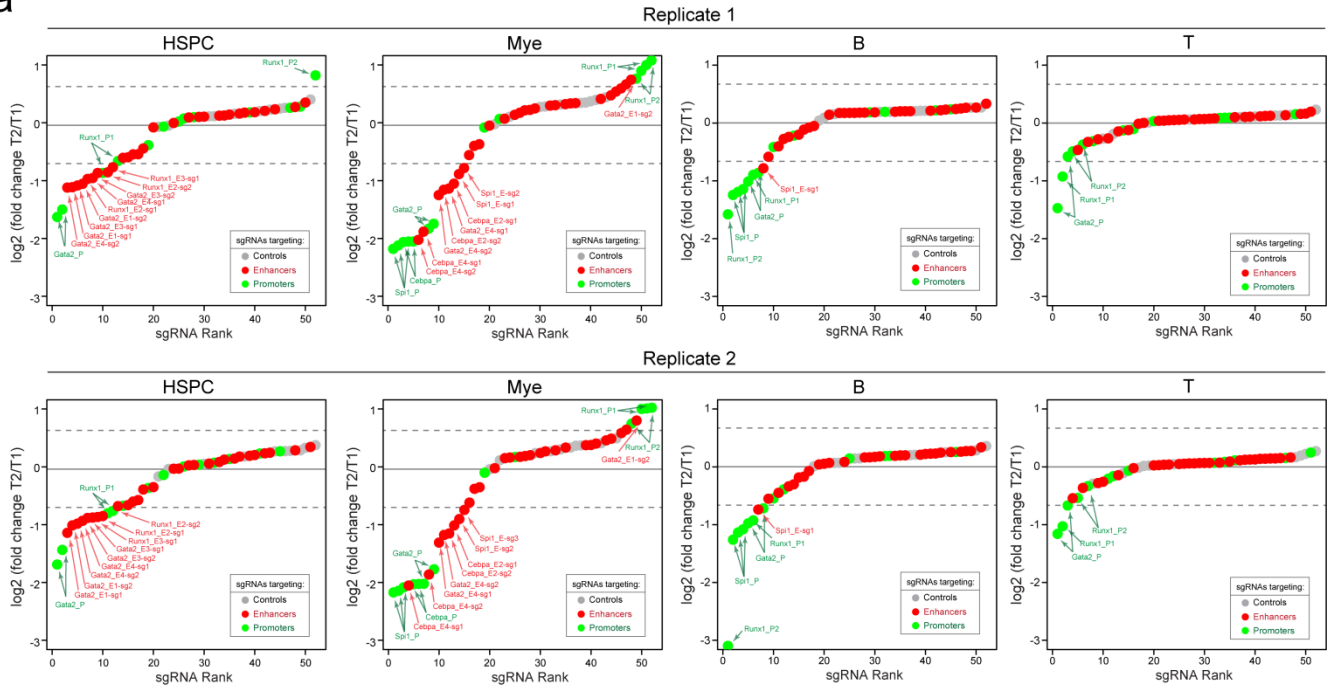

**b**

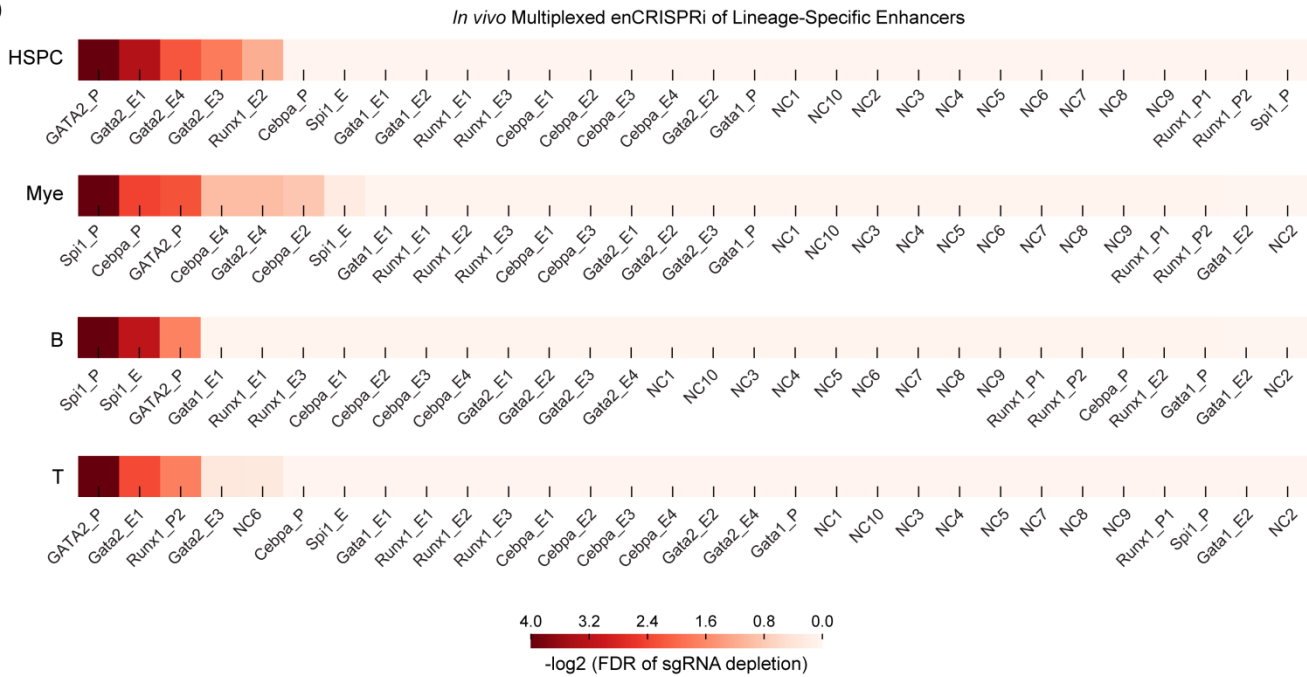

**Supplementary Figure 12. Pooled sgRNA-Mediated *In Vivo* enCRISPRi Perturbations of Promoters and Enhancers during Hematopoiesis**

- (a) *In vivo* perturbation of annotated CREs for five key hematopoietic TFs. Similar to Fig. 6b, waterfall plots are shown for two independent replicate screens ( $N = 15$  recipient mice per screen).
- (b) Ranking of the top depleted CREs by the  $-\log_2(\text{FDR of sgRNA depletion})$  by multiplexed enCRISPRi screens. The significance (FDR) of depletion for each targeted enhancer, promoter or non-targeting control (NC) region in each cell type was calculated using the MAGECK test. P, promoter; E, enhancer; NC, non-targeting control.

## **SUPPLEMENTARY TABLES**

### **Supplementary Table 1. List of Genomic Datasets Used in This Study**

The name, data type, cell type, GEO accession number and citation for each dataset are shown.

### **Supplementary Table 2. Sequences of Primers and sgRNAs**

The name and sequence of each primer or sgRNA are shown.

**Supplementary Table 1. List of Genomic Datasets Used in This Study**

| <b>Datasets</b>                               | <b>Data Type</b> | <b>Cell Type</b> | <b>GEO ID</b> | <b>Citation</b> |
|-----------------------------------------------|------------------|------------------|---------------|-----------------|
| ChIP-seq_Jurkat-H3K27ac                       | ChIP-seq         | Jurkat           | GSM3854054    | This study      |
| ChIP-seq_293T_enCRISPRa_sgGal4_HA_rep1        | ChIP-seq         | 293T             | GSM3854055    | This study      |
| ChIP-seq_293T_enCRISPRa_sgGal4_HA_rep2        | ChIP-seq         | 293T             | GSM3854056    | This study      |
| ChIP-seq_293T_enCRISPRa_sgHS2_HA_rep1         | ChIP-seq         | 293T             | GSM3854057    | This study      |
| ChIP-seq_293T_enCRISPRa_sgHS2_HA_rep2         | ChIP-seq         | 293T             | GSM3854058    | This study      |
| ChIP-seq_K562_enCRISPRi-LK_sgGal4_HA_rep1     | ChIP-seq         | K562             | GSM3854059    | This study      |
| ChIP-seq_K562_enCRISPRi-LK_sgGal4_HA_rep2     | ChIP-seq         | K562             | GSM3854060    | This study      |
| ChIP-seq_K562_enCRISPRi-LK_sgHS2_HA_rep1      | ChIP-seq         | K562             | GSM3854061    | This study      |
| ChIP-seq_K562_enCRISPRi-LK_sgHS2_HA_rep2      | ChIP-seq         | K562             | GSM3854062    | This study      |
| ChIP-seq_K562_dCas9-KRAB_sgHS2_cas9_rep1      | ChIP-seq         | K562             | GSM3854063    | This study      |
| ChIP-seq_K562_dCas9-KRAB_sgHS2_cas9_rep2      | ChIP-seq         | K562             | GSM3854064    | This study      |
| ChIP-seq_K562_dCas9-KRAB_sgHS2_CTCF_rep1      | ChIP-seq         | K562             | GSM3854065    | This study      |
| ChIP-seq_K562_dCas9-KRAB_sgHS2_CTCF_rep2      | ChIP-seq         | K562             | GSM3854066    | This study      |
| ChIP-seq_K562_dCas9-KRAB_sgHS2_GATA1_rep1     | ChIP-seq         | K562             | GSM3854067    | This study      |
| ChIP-seq_K562_dCas9-KRAB_sgHS2_GATA1_rep2     | ChIP-seq         | K562             | GSM3854068    | This study      |
| ChIP-seq_K562_dCas9-KRAB_sgHS2_H3K27ac_rep1   | ChIP-seq         | K562             | GSM3854069    | This study      |
| ChIP-seq_K562_dCas9-KRAB_sgHS2_H3K27ac_rep2   | ChIP-seq         | K562             | GSM3854070    | This study      |
| ChIP-seq_K562_dCas9-KRAB_sgHS2_H3K4me2_rep1   | ChIP-seq         | K562             | GSM3854071    | This study      |
| ChIP-seq_K562_dCas9-KRAB_sgHS2_H3K4me2_rep2   | ChIP-seq         | K562             | GSM3854072    | This study      |
| ChIP-seq_K562_dCas9-KRAB_sgHS2_H3K4me_rep1    | ChIP-seq         | K562             | GSM3854073    | This study      |
| ChIP-seq_K562_dCas9-KRAB_sgHS2_H3K4me_rep2    | ChIP-seq         | K562             | GSM3854074    | This study      |
| ChIP-seq_K562_dCas9-KRAB_sgHS2_H3K9me3_rep1   | ChIP-seq         | K562             | GSM3854075    | This study      |
| ChIP-seq_K562_dCas9-KRAB_sgHS2_H3K9me3_rep2   | ChIP-seq         | K562             | GSM3854076    | This study      |
| ChIP-seq_K562_dCas9-KRAB_sgHS2_TAL1_rep1      | ChIP-seq         | K562             | GSM3854077    | This study      |
| ChIP-seq_K562_dCas9-KRAB_sgHS2_TAL1_rep2      | ChIP-seq         | K562             | GSM3854078    | This study      |
| ChIP-seq_K562_dCas9-LSD1_sgHS2_cas9_rep1      | ChIP-seq         | K562             | GSM3854079    | This study      |
| ChIP-seq_K562_dCas9-LSD1_sgHS2_cas9_rep2      | ChIP-seq         | K562             | GSM3854080    | This study      |
| ChIP-seq_K562_dCas9-LSD1_sgHS2_CTCF_rep1      | ChIP-seq         | K562             | GSM3854081    | This study      |
| ChIP-seq_K562_dCas9-LSD1_sgHS2_CTCF_rep2      | ChIP-seq         | K562             | GSM3854082    | This study      |
| ChIP-seq_K562_dCas9-LSD1_sgHS2_GATA1_rep1     | ChIP-seq         | K562             | GSM3854083    | This study      |
| ChIP-seq_K562_dCas9-LSD1_sgHS2_GATA1_rep2     | ChIP-seq         | K562             | GSM3854084    | This study      |
| ChIP-seq_K562_dCas9-LSD1_sgHS2_H3K27ac_rep1   | ChIP-seq         | K562             | GSM3854085    | This study      |
| ChIP-seq_K562_dCas9-LSD1_sgHS2_H3K27ac_rep2   | ChIP-seq         | K562             | GSM3854086    | This study      |
| ChIP-seq_K562_dCas9-LSD1_sgHS2_H3K4me2_rep1   | ChIP-seq         | K562             | GSM3854087    | This study      |
| ChIP-seq_K562_dCas9-LSD1_sgHS2_H3K4me2_rep2   | ChIP-seq         | K562             | GSM3854088    | This study      |
| ChIP-seq_K562_dCas9-LSD1_sgHS2_H3K4me_rep1    | ChIP-seq         | K562             | GSM3854089    | This study      |
| ChIP-seq_K562_dCas9-LSD1_sgHS2_H3K4me_rep2    | ChIP-seq         | K562             | GSM3854090    | This study      |
| ChIP-seq_K562_dCas9-LSD1_sgHS2_H3K9me3_rep1   | ChIP-seq         | K562             | GSM3854091    | This study      |
| ChIP-seq_K562_dCas9-LSD1_sgHS2_H3K9me3_rep2   | ChIP-seq         | K562             | GSM3854092    | This study      |
| ChIP-seq_K562_dCas9-LSD1_sgHS2_TAL1_rep1      | ChIP-seq         | K562             | GSM3854093    | This study      |
| ChIP-seq_K562_dCas9-LSD1_sgHS2_TAL1_rep2      | ChIP-seq         | K562             | GSM3854094    | This study      |
| ChIP-seq_K562_enCRISPRi-KL_sgHS2_cas9_rep1    | ChIP-seq         | K562             | GSM3854095    | This study      |
| ChIP-seq_K562_enCRISPRi-KL_sgHS2_cas9_rep2    | ChIP-seq         | K562             | GSM3854096    | This study      |
| ChIP-seq_K562_enCRISPRi-KL_sgHS2_CTCF_rep1    | ChIP-seq         | K562             | GSM3854097    | This study      |
| ChIP-seq_K562_enCRISPRi-KL_sgHS2_CTCF_rep2    | ChIP-seq         | K562             | GSM3854098    | This study      |
| ChIP-seq_K562_enCRISPRi-KL_sgHS2_GATA1_rep1   | ChIP-seq         | K562             | GSM3854099    | This study      |
| ChIP-seq_K562_enCRISPRi-KL_sgHS2_GATA1_rep2   | ChIP-seq         | K562             | GSM3854100    | This study      |
| ChIP-seq_K562_enCRISPRi-KL_sgHS2_H3K27ac_rep1 | ChIP-seq         | K562             | GSM3854101    | This study      |
| ChIP-seq_K562_enCRISPRi-KL_sgHS2_H3K27ac_rep2 | ChIP-seq         | K562             | GSM3854102    | This study      |
| ChIP-seq_K562_enCRISPRi-KL_sgHS2_H3K4me2_rep1 | ChIP-seq         | K562             | GSM3854103    | This study      |
| ChIP-seq_K562_enCRISPRi-KL_sgHS2_H3K4me2_rep2 | ChIP-seq         | K562             | GSM3854104    | This study      |
| ChIP-seq_K562_enCRISPRi-KL_sgHS2_H3K4me_rep1  | ChIP-seq         | K562             | GSM3854105    | This study      |
| ChIP-seq_K562_enCRISPRi-KL_sgHS2_H3K4me_rep2  | ChIP-seq         | K562             | GSM3854106    | This study      |
| ChIP-seq_K562_enCRISPRi-KL_sgHS2_H3K9me3_rep1 | ChIP-seq         | K562             | GSM3854107    | This study      |
| ChIP-seq_K562_enCRISPRi-KL_sgHS2_H3K9me3_rep2 | ChIP-seq         | K562             | GSM3854108    | This study      |
| ChIP-seq_K562_enCRISPRi-KL_sgHS2_TAL1_rep1    | ChIP-seq         | K562             | GSM3854109    | This study      |
| ChIP-seq_K562_enCRISPRi-KL_sgHS2_TAL1_rep2    | ChIP-seq         | K562             | GSM3854110    | This study      |
| ChIP-seq_K562_enCRISPRi-LK_sgHS2_cas9_rep1    | ChIP-seq         | K562             | GSM3854111    | This study      |
| ChIP-seq_K562_enCRISPRi-LK_sgHS2_cas9_rep2    | ChIP-seq         | K562             | GSM3854112    | This study      |
| ChIP-seq_K562_enCRISPRi-LK_sgHS2_CTCF_rep1    | ChIP-seq         | K562             | GSM3854113    | This study      |

|                                                |          |              |            |                                  |
|------------------------------------------------|----------|--------------|------------|----------------------------------|
| ChIP-seq_K562_enCRISPRi-LK_sgHS2_CTCF_rep2     | ChIP-seq | K562         | GSM3854114 | This study                       |
| ChIP-seq_K562_enCRISPRi-LK_sgHS2_GATA1_rep1    | ChIP-seq | K562         | GSM3854115 | This study                       |
| ChIP-seq_K562_enCRISPRi-LK_sgHS2_GATA1_rep2    | ChIP-seq | K562         | GSM3854116 | This study                       |
| ChIP-seq_K562_enCRISPRi-LK_sgHS2_H3K27ac_rep1  | ChIP-seq | K562         | GSM3854117 | This study                       |
| ChIP-seq_K562_enCRISPRi-LK_sgHS2_H3K27ac_rep2  | ChIP-seq | K562         | GSM3854118 | This study                       |
| ChIP-seq_K562_enCRISPRi-LK_sgHS2_H3K4me2_rep1  | ChIP-seq | K562         | GSM3854119 | This study                       |
| ChIP-seq_K562_enCRISPRi-LK_sgHS2_H3K4me2_rep2  | ChIP-seq | K562         | GSM3854120 | This study                       |
| ChIP-seq_K562_enCRISPRi-LK_sgHS2_H3K4me_rep1   | ChIP-seq | K562         | GSM3854121 | This study                       |
| ChIP-seq_K562_enCRISPRi-LK_sgHS2_H3K4me_rep2   | ChIP-seq | K562         | GSM3854122 | This study                       |
| ChIP-seq_K562_enCRISPRi-LK_sgHS2_H3K9me3_rep1  | ChIP-seq | K562         | GSM3854123 | This study                       |
| ChIP-seq_K562_enCRISPRi-LK_sgHS2_H3K9me3_rep2  | ChIP-seq | K562         | GSM3854124 | This study                       |
| ChIP-seq_K562_enCRISPRi-LK_sgHS2_TAL1_rep1     | ChIP-seq | K562         | GSM3854125 | This study                       |
| ChIP-seq_K562_enCRISPRi-LK_sgHS2_TAL1_rep2     | ChIP-seq | K562         | GSM3854126 | This study                       |
| ChIP-seq_K562_sgGal4_Cas9_rep1                 | ChIP-seq | K562         | GSM3854127 | This study                       |
| ChIP-seq_K562_sgGal4_Cas9_rep2                 | ChIP-seq | K562         | GSM3854128 | This study                       |
| ChIP-seq_K562_sgGal4_CTCF_rep1                 | ChIP-seq | K562         | GSM3854129 | This study                       |
| ChIP-seq_K562_sgGal4_CTCF_rep2                 | ChIP-seq | K562         | GSM3854130 | This study                       |
| ChIP-seq_K562_sgGal4_GATA1_rep1                | ChIP-seq | K562         | GSM3854131 | This study                       |
| ChIP-seq_K562_sgGal4_GATA1_rep2                | ChIP-seq | K562         | GSM3854132 | This study                       |
| ChIP-seq_K562_sgGal4_H3K27ac_rep1              | ChIP-seq | K562         | GSM3854133 | This study                       |
| ChIP-seq_K562_sgGal4_H3K27ac_rep2              | ChIP-seq | K562         | GSM3854134 | This study                       |
| ChIP-seq_K562_sgGal4_H3K4me2_rep1              | ChIP-seq | K562         | GSM3854135 | This study                       |
| ChIP-seq_K562_sgGal4_H3K4me2_rep2              | ChIP-seq | K562         | GSM3854136 | This study                       |
| ChIP-seq_K562_sgGal4_H3K4me_rep1               | ChIP-seq | K562         | GSM3854137 | This study                       |
| ChIP-seq_K562_sgGal4_H3K4me_rep2               | ChIP-seq | K562         | GSM3854138 | This study                       |
| ChIP-seq_K562_sgGal4_H3K9me3_rep1              | ChIP-seq | K562         | GSM3854139 | This study                       |
| ChIP-seq_K562_sgGal4_H3K9me3_rep2              | ChIP-seq | K562         | GSM3854140 | This study                       |
| ChIP-seq_K562_sgGal4_TAL1_rep1                 | ChIP-seq | K562         | GSM3854141 | This study                       |
| ChIP-seq_K562_sgGal4_TAL1_rep2                 | ChIP-seq | K562         | GSM3854142 | This study                       |
| ChIP-seq_K562_dCas9-KRAB_sgHS2_H3K27me3_rep1   | ChIP-seq | K562         | GSM4190316 | This study                       |
| ChIP-seq_K562_dCas9-KRAB_sgHS2_H3K27me3_rep2   | ChIP-seq | K562         | GSM4190317 | This study                       |
| ChIP-seq_K562_dCas9-LSD1_sgHS2_H3K27me3_rep1   | ChIP-seq | K562         | GSM4190318 | This study                       |
| ChIP-seq_K562_dCas9-LSD1_sgHS2_H3K27me3_rep2   | ChIP-seq | K562         | GSM4190319 | This study                       |
| ChIP-seq_K562_enCRISPRi-KL_sgHS2_H3K27me3_rep1 | ChIP-seq | K562         | GSM4190320 | This study                       |
| ChIP-seq_K562_enCRISPRi-KL_sgHS2_H3K27me3_rep2 | ChIP-seq | K562         | GSM4190321 | This study                       |
| ChIP-seq_K562_enCRISPRi-LK_sgHS2_H3K27me3_rep1 | ChIP-seq | K562         | GSM4190322 | This study                       |
| ChIP-seq_K562_enCRISPRi-LK_sgHS2_H3K27me3_rep2 | ChIP-seq | K562         | GSM4190323 | This study                       |
| ChIP-seq_K562_sgGal4_H3K27me3_rep1             | ChIP-seq | K562         | GSM4190324 | This study                       |
| ChIP-seq_K562_sgGal4_H3K27me3_rep2             | ChIP-seq | K562         | GSM4190325 | This study                       |
| RNA-seq_K562_dCas9-KRAB_sgHS2_rep1             | RNA-seq  | K562         | GSM3854143 | This study                       |
| RNA-seq_K562_dCas9-KRAB_sgHS2_rep2             | RNA-seq  | K562         | GSM3854144 | This study                       |
| RNA-seq_K562_dCas9-LSD1_sgHS2_rep1             | RNA-seq  | K562         | GSM3854145 | This study                       |
| RNA-seq_K562_dCas9-LSD1_sgHS2_rep2             | RNA-seq  | K562         | GSM3854146 | This study                       |
| RNA-seq_K562_enCRISPRi-KL_sgHS2_rep1           | RNA-seq  | K562         | GSM3854147 | This study                       |
| RNA-seq_K562_enCRISPRi-KL_sgHS2_rep2           | RNA-seq  | K562         | GSM3854148 | This study                       |
| RNA-seq_K562_enCRISPRi-LK_sgHS2_rep1           | RNA-seq  | K562         | GSM3854149 | This study                       |
| RNA-seq_K562_enCRISPRi-LK_sgHS2_rep2           | RNA-seq  | K562         | GSM3854150 | This study                       |
| RNA-seq_K562_sgGal4_rep1                       | RNA-seq  | K562         | GSM3854151 | This study                       |
| RNA-seq_K562_sgGal4_rep2                       | RNA-seq  | K562         | GSM3854152 | This study                       |
| ATAC-seq_Jurkat                                | ATAC-seq | Jurkat       | GSM3854041 | This study                       |
| ATAC_seq_B                                     | ATAC-seq | B cell       | GSM1463172 | Lara-Astiaso et al, Science 2014 |
| ATAC_seq_Monocytes                             | ATAC-seq | Monocytes    | GSM1463174 | Lara-Astiaso et al, Science 2014 |
| ATAC_seq_CD4                                   | ATAC-seq | T cell       | GSM1463175 | Lara-Astiaso et al, Science 2014 |
| ATAC_seq_Granulocytes                          | ATAC-seq | Granulocytes | GSM1463176 | Lara-Astiaso et al, Science 2014 |
| ATAC_seq_CD8                                   | ATAC-seq | T cell       | GSM1463178 | Lara-Astiaso et al, Science 2014 |
| ATAC_seq_LSK                                   | ATAC-seq | LSK cell     | GSM1463179 | Lara-Astiaso et al, Science 2014 |
| ChIP-seq_H3K27Ac_LT_HSC                        | ChIP-seq | LT-HSC       | GSM1441269 | Lara-Astiaso et al, Science 2014 |
| ChIP-seq_H3K27Ac_GN                            | ChIP-seq | Granulocytes | GSM1441277 | Lara-Astiaso et al, Science 2014 |
| ChIP-seq_H3K27Ac_Mono                          | ChIP-seq | Monocytes    | GSM1441278 | Lara-Astiaso et al, Science 2014 |
| ChIP-seq_H3K27Ac_B                             | ChIP-seq | B cell       | GSM1441280 | Lara-Astiaso et al, Science 2014 |
| ChIP-seq_H3K27Ac_CD4                           | ChIP-seq | T cell       | GSM1441281 | Lara-Astiaso et al, Science 2014 |
| ChIP-seq_H3K27Ac_CD8                           | ChIP-seq | T cell       | GSM1441282 | Lara-Astiaso et al, Science 2014 |

Supplementary Table 2. Sequences of Primers and sgRNAs

| Name                           | Forward                                 | Reverse                                  | Application                                 |                          |
|--------------------------------|-----------------------------------------|------------------------------------------|---------------------------------------------|--------------------------|
| HS2-1-sgRNA                    | CACCGAATATGTCACATTCTGTCTC               | AAACGAGACAGAATGTGACATATTC                | sgRNA for enhancer or promoter perturbation |                          |
| HS2-2-sgRNA                    | CACCGGAGCTATGGGAGGTCACTAA               | AAACTAGTGACCTCCCATAGTCCC                 |                                             |                          |
| HS2-3-sgRNA                    | CACCGGAAAGGTATACAGAACCAAGA              | AAACTCTGGTCTGTGTACCTCTCC                 |                                             |                          |
| HS2-4-sgRNA                    | CACCGGCGCTGTAAAGCATCCTGTG               | AAACGAGCAGATGCTACAGGGCC                  |                                             |                          |
| IL1RN-sgRNA1                   | CACCGTGTACTCTCTGAGGTGCTC                | AAACGACACCTCAGAGAGTACAC                  |                                             |                          |
| IL1RN-sgRNA2                   | CACCGCATCAAGTCAGCCATCAGC                | AAACGCTGATGCTGACTTGTATG                  |                                             |                          |
| OCT4-sgRNA1                    | CACCGACTCCACTGCACCTCCAGTCT              | AAACAGACTGGAGTGCAGTGGAGTC                |                                             |                          |
| OCT4-sgRNA2                    | CACCGACACCATTTGCCACCACCAT               | AAACATGGTGGTGGCAATGGTGTCT                |                                             |                          |
| MYOD-sgRNA1                    | CACCGGGCCACATTTCCCTTCCAG                | AAACCTGGAAAGGAATGGGGCCCC                 |                                             |                          |
| MYOD-sgRNA2                    | CACCGGGGCTGGATTTGGGTTCDBAG              | AAACCTGGAAACCCATTCACCTGCC                |                                             |                          |
| Gata4-sgRNA                    | CACCGGAGCTGTAGTATAGCCGTGT               | AAACTAGCAGGTAAGTACTAGTGTCT               |                                             |                          |
| Chf5-sgRNA                     | CACCGTAGCGGTAAAGATGTAGAC                | AAAGTCTACATCTTACCOCCTAC                  |                                             |                          |
| TAD1-sgRNA                     | CACCGTTGAAGTGTCCGATAGGA                 | AAACTCTATCGGGACTTTGTAAC                  |                                             |                          |
| CTCF1-sgRNA                    | CACCGACCAAGAAACACATCCAGAT               | AAACATCTGGGATGTGTTCTGTGTC                |                                             |                          |
| CTCF2-sgRNA                    | CACCGTTAGACAGCAATGTTATCC                | AAACGGATAAACATTTGCTCTAAC                 |                                             |                          |
| TAD2-sgRNA                     | CACCGCAGCGAGACTCCGCTGGCGT               | AAACACGCCGACGGAGTCTCGCTGG                |                                             |                          |
| HS1-sgRNA                      | CACCGCAATAGTATATGAGGAGAGC               | AAACGCTCTCTCATATACCTATGTC                |                                             |                          |
| HS2-sgRNA                      | CACCGGAGCTGTAAAGCATCCTGTG               | AAACTAGCAGGTAAGTACTAGTGTCT               |                                             |                          |
| HS3-sgRNA                      | CACCGTTTGGAGGAGGAGTCTCTTA               | AAACTAGAGACTCTGTCCCAAAC                  |                                             |                          |
| HS4-sgRNA                      | CACCGCCCACTCAGCAGCTATGAGA               | AAACTCTATAGCTGTGAGTGGGCG                 |                                             |                          |
| HS5-sgRNA                      | CACCGTCCCCACCTTACAGGGAC                 | AAACCTCCCTGAAGGTGGGGGAC                  |                                             |                          |
| HS2+2.5k-sgRNA                 | CACCGCAGCTCTCTACTCAGAAT                 | AAACATCTGAGGTAGAGACTGTGC                 |                                             |                          |
| HS2+0.5k-sgRNA                 | CACCGGGCCACCTTGGACAGCTAGG               | AAACCTAGCTGCCGGGGTGGCC                   |                                             |                          |
| HS2-0k-sgRNA                   | CACCGGAAAGTATACAGAACCAAGA               | AAACTCTGGTCTGTGTAACTTCC                  |                                             |                          |
| HS2-2.5k-sgRNA                 | CACCGGAGCTGTAAAGCATCCTGTG               | AAACCCAGAGTAAAGCTAGTGTCT                 |                                             |                          |
| HS2+0.5k-sgRNA                 | CACCGAATAGAGGATTTATGGGAT                | AAACTCCGATAAATACCTCTATTC                 |                                             |                          |
| HBG-sgRNA                      | CACCGGCTAAACTCCACCCATGGGT               | AAACCCATCGGTGGGATTTAGCC                  |                                             |                          |
| TAL1-Mut-sgRNA1                | CACCGAGGTCACAGAAAGCGGTT                 | AAACACCCCTTCTTCTGTGAGCCCTC               |                                             |                          |
| TAL1-Mut-sgRNA2                | CACCGACAGAAAGCGGTTAGGAAA                | AAACTTCTTAAACCGCTTCTGTCTC                |                                             |                          |
| TAL1-WT-sgRNA1                 | CACCGGAATGGGGTGGGGCAACCAC               | AAACGCTGGTTCGCCCAACCCATCTC               |                                             |                          |
| TAL1-WT-sgRNA2                 | CACCGAAAGACTATCCACTCTCTCC               | AAACCGAAAGTAGGGTTACCTTTTC                |                                             |                          |
| Sp1-P-sg1                      | ccacgcCAAGTCTCTGATTTTATCGA              | aaacCGATGTCAAGAGAGTGTCTC                 |                                             |                          |
| Sp1-P-sg2                      | ccacgcCCCTCTCTTGGATGATGTC               | aaacCGATGTCAAGAGAGTGTCTC                 |                                             |                          |
| Sp1-P-sg3                      | ccacgcAGGCTGTGGGTGACAGCGCA              | aaacTGCGTCTGACCCAGACCGCTC                |                                             |                          |
| Sp1-Enh-sg1                    | ccacgcAGGAAGCGCCAGTCCACCAC              | aaacTGGTGTACTGGCGCTCTCTC                 |                                             |                          |
| Sp1-Enh-sg2                    | ccacgcTGCCACGCCCTGGAGCGGCC              | aaacGGGCGGCTCCAGCTGGGCAc                 |                                             |                          |
| Sp1-Enh-sg3                    | ccacgcAGTGCCTCTTTCCACAT                 | aaacGTGGAAACGGGGGAGCTC                   |                                             |                          |
| Cebpa-P-sg1                    | ccacgcGTGCTAGTGAGAGAGATGCG              | aaacCGATCTCTCCACTAGCAc                   |                                             |                          |
| Cebpa-P-sg2                    | ccacgcGCTTCCAAAGCGGTGGAGTGT             | aaacCACTCAGCTGTGGAAGATG                  |                                             |                          |
| Cebpa-Enh1-sg1                 | ccacgcTCTCCTCTCTTTAATAGAGC              | aaacCGATTTAAAGAGAGTGTCTC                 |                                             |                          |
| Cebpa-Enh1-sg2                 | ccacgcGTGCTGCTTTCTACAC                  | aaacTGGTGAGAAAGCAGCAGCAc                 |                                             |                          |
| Cebpa-Enh2-sg1                 | ccacgcGTAATGCCCGGCAAGAACT               | aaacAGTCTGCCGGGCAACTCac                  |                                             |                          |
| Cebpa-Enh2-sg2                 | ccacgcTCTGACGGCTCTAACCTGA               | aaacTCAGGTTAGGACCCGTCAc                  |                                             |                          |
| Cebpa-Enh3-sg1                 | ccacgcCTTCTATCAGGATCAAAA                | aaacTTTGATCCGTGTGAGAAc                   |                                             |                          |
| Cebpa-Enh3-sg2                 | ccacgcTGTCTTGTGTTGGGGCCAC               | aaacTGCGCCCAAAACAGAAc                    |                                             |                          |
| Cebpa-Enh4-sg1                 | ccacgcAAACGGAGTACTGAGCTA                | aaacTAGCTCAGTACTCCCTGTC                  |                                             |                          |
| Cebpa-Enh4-sg2                 | ccacgcCGGAGTGTGACATATATCC               | aaacGAGATATTGAGAGTGTCTC                  |                                             |                          |
| Gata2-P-sg1                    | ccacgcGTCTCGGCTCCCGCCGCC                | aaacGGGCGGCCGAGGCGGAGCAc                 |                                             |                          |
| Gata2-P-sg2                    | ccacgcCTGCACAGCTGGAAGCGG                | aaacCGCTTCACTGTGTGAGCAGG                 |                                             |                          |
| Gata2-Enh1-sg1                 | ccacgcAGGTGGCCACGGGGTGGCG               | aaacCGCCACCCCTGGGCGACCTC                 |                                             |                          |
| Gata2-Enh1-sg2                 | ccacgcCCTGCAGCAGGGGTTCTGC               | aaacCGAGAACCCCTGCTCGAGGc                 |                                             |                          |
| Gata2-Enh2-sg1                 | ccacgcAACTTACGGAACCAACTTGT              | aaacCAAGGTGTTTCCGTAAGTc                  |                                             |                          |
| Gata2-Enh2-sg2                 | ccacgcAGGTGGATGGCCGGCCACT               | aaacAGTGGCCCGGCTCCAGCTC                  |                                             |                          |
| Gata2-Enh3-sg1                 | ccacgcTGGCGACAGAGATAGAGC                | aaacCGATCTGATGCTCCAGTGTc                 |                                             |                          |
| Gata2-Enh3-sg2                 | ccacgcCCCGAGCTTATTATACAG                | aaacSGCTATAATAAGACTCCGGc                 |                                             |                          |
| Gata2-Enh4-sg1                 | ccacgcACTCCGGGAGAGATCCGAA               | aaacTCGATCTCTGCGGAGTc                    |                                             |                          |
| Gata2-Enh4-sg2                 | ccacgcGCTCTGAAAACCTTGCCTGTC             | aaacGACCGCAAGTTTTCAGAGC                  |                                             |                          |
| Gata1-P-sg1                    | ccacgcCGGAGGACTAGAGCTTAA                | aaacTTTAGGCTAGTCCCTCCGc                  |                                             |                          |
| Gata1-P-sg2                    | ccacgcAAGGGATCCCAACAAGCTGC              | aaacCGAGGTTTGGATCCCTCTc                  |                                             |                          |
| Gata1-Enh1-sg1                 | ccacgcGTAGATTAAGGGAATGAGCGG             | aaacCGGCTGATCCCTTATGATc                  |                                             |                          |
| Gata1-Enh1-sg2                 | ccacgcCACAGAGAGAGCGCTTCAAC              | aaacCGTTCAGGCTCTCTCTCTc                  |                                             |                          |
| Gata1-Enh2-sg1                 | ccacgcACTATTGTGGGAAAGTCTC               | aaacGAGACTTCCGCAAAATGTC                  |                                             |                          |
| Gata1-Enh2-sg2                 | ccacgcTAAAGTGACAGTAAAGCGA               | aaacTGCTTTACTGTCACTTTACc                 |                                             |                          |
| Runx1-P1-sg1                   | ccacgcGGAATGGAATCTCCGGGTC               | aaacGACCCGAGGAATCCACTCCc                 |                                             |                          |
| Runx1-P1-sg2                   | ccacgcGTAAGGACAGTCTCATTTCC              | aaacGAAATGAACTGCTTTTACc                  |                                             |                          |
| Runx1-P2-sg1                   | ccacgcGAACCAAGTTGGGTAGCC                | aaacGGCTACCCAACTTGTGGTCTc                |                                             |                          |
| Runx1-P2-sg2                   | ccacgcGGTGTGTGTAAGAACTTCTT              | aaacAAGAAATTTTACACAACTCCc                |                                             |                          |
| Runx1-Enh1-sg1                 | ccacgcGCATTTCTGCTCTCCACAG               | aaacCTGTGAGGAGCAATATGTC                  |                                             |                          |
| Runx1-Enh1-sg2                 | ccacgcATCCCGCCCGCAGCAGACT               | aaacCACTCTGCTGGCGGGGATc                  |                                             |                          |
| Runx1-Enh2-sg1                 | ccacgcTCAAGGAGCGGAAACCCCG               | aaacCGGTTTCTGCTCTTGCAC                   |                                             |                          |
| Runx1-Enh2-sg2                 | ccacgcATGCTGCAGGCTCAGATGG               | aaacCACTGAGGCTGTCAAGATc                  |                                             |                          |
| Runx1-Enh3-sg1                 | ccacgcTGTGCGCAGTTCGCCACGC               | aaacGCTGGGCAATGCTCGACAC                  |                                             |                          |
| Runx1-Enh3-sg2                 | ccacgcGATCTGAGTTTGTACTCTT               | aaacAAAGTGAATAAAGTCAAGTc                 |                                             |                          |
| NC-sg1                         | ccacgcGAGTGTGCAAGGACCCGGT               | aaacACCGGCTCCCTTGAACTCTc                 |                                             |                          |
| NC-sg2                         | ccacgcGCATTTGAGCAGACTGAGAG              | aaacCTGTGAGGAGCAATATGTC                  |                                             |                          |
| NC-sg3                         | ccacgcCCAGTTCACAGATGATGAC               | aaacGTGATCTGTGCTGAGTCTc                  |                                             |                          |
| NC-sg4                         | ccacgcGGTGTGCTGATGTGTCAGA               | aaacCTGACACTCAGCAGCACCCc                 |                                             |                          |
| NC-sg5                         | ccacgcGCTATGCTACGAGACTATAG              | aaacCTATAGTCCGTAGCATAGGC                 |                                             |                          |
| NC-sg6                         | ccacgcGTGGCTGTGACAGCGCAG                | aaacCTGCGCTTACCAGGCCACCc                 |                                             |                          |
| NC-sg7                         | ccacgcGGGGCTGACCCAGATAGCA               | aaacTGCTATCGTGGTCCGGCCCCc                |                                             |                          |
| NC-sg8                         | ccacgcGAGAGGTTTAAAGAGCGCG               | aaacCGCTGCTTGAACCTCTCTc                  |                                             |                          |
| NC-sg9                         | ccacgcCGCGAAGGCGAGATTAAAC               | aaacCTTTAATCTGCTTCTGCTC                  |                                             |                          |
| NC-sg10                        | ccacgcCCCAACCAACAAAGAGCGG               | aaacCGCTCTTTGCTTGGCTGc                   |                                             |                          |
| IL1RN-RT                       | GGATCCATGGAGGGAAGAT                     | TGTTCTCGCTCAGTCTAGT                      | RT-qPCR primers                             |                          |
| MYOD-RT                        | TCCTCTTTACCGTCTCAC                      | AACACCCGACTGCTGTATCC                     |                                             |                          |
| OCT4-RT                        | CGAAAGGAAAGCGAACCAGTATCGAGAAC           | CGTTGTGCATGTCTGCTTGTATCCG                |                                             |                          |
| HBE1-RT                        | GCAAGAAAGTGTGCTGACTTCC                  | ACCATCAGTACCAGGAG                        |                                             |                          |
| HBG-RT                         | TGGATGATCTCAAGGGCAC                     | TCAGTGGTATCTGGAGGACA                     |                                             |                          |
| HBβ-RT                         | CTGAGGAGAAGTCTGGCGTTA                   | AGCATCAGAGAGTGGACAGAT                    |                                             |                          |
| GAPDH-RT                       | AGCTCAAGATCTGCAGATGATCC                 | GATAGATGCTGGATGACACT                     |                                             |                          |
| TAL1-RT                        | GTCCAGCTGATCTCCGCCCC                    | CCGCGTCCCAAGAACCCCG                      |                                             |                          |
| Sp1-RT                         | TACCAAGTCCAAATGCATGACTAC                | GAGTATCGAGAGCTGCATCTGTT                  |                                             |                          |
| Runx1-RT                       | CCAGCAAGCTGAGGAGCGGGC                   | TGACGGTGACCAAGAGT                        |                                             |                          |
| Gata1-RT                       | CAGAACCCGCCCTCTCATCC                    | TAGTGCATTGGGTGCTCTG                      |                                             |                          |
| Gata2-RT                       | GCAGAAAGCAAGGCTGCG                      | CAGTTGACCACTCCCGG                        |                                             |                          |
| Cebpa-RT                       | CGCGGAAAGCAACAACATC                     | GTCACTGGTCAACTCCAGAC                     |                                             |                          |
| EP300-RT                       | AGCCAAAGGCTCTAACTC                      | TCACACCATGTTAGTCCG                       |                                             |                          |
| ANKRD20A2-RT                   | CAATATAAGAAAGATGTGAAGC                  | TCCATCAGCACTTTCATCTTC                    |                                             |                          |
| ANKRD30B-RT                    | TGCTGTCTGTGGATTAATCTC                   | TTACGCCGTGACGGTGTCTTTC                   |                                             |                          |
| ZNF806-RT                      | GATAAACCCTGACCAAGACGTTG                 | TCCTTTGTTTCAAATCTCCAG                    |                                             |                          |
| LOC101928195-RT                | AAGATAAGGACCATTTGCCAGG                  | AGGTAAAGTAAAGTCCCTGGCAC                  |                                             |                          |
| Cebpg-RT                       | AGCGGCTTACAGCAGGTTT                     | GGCGGATTTGCTCACTATCC                     |                                             |                          |
| Slc7a10-RT                     | GGGTTTGCCCTCTTCGATC                     | GACATAGGCGTATGTCGCC                      |                                             |                          |
| Slc39a19-RT                    | AGTGGCTATCTCAACTGCTT                    | CCCGATCTTTTGTCTGAGCA                     |                                             |                          |
| Glo1b-RT                       | CCCTTCCCGTGTCTTACTG                     | CCCGAGATCTTGAATAAACA                     |                                             |                          |
| Rpn1-RT                        | GCTCCACATCAGAGCCAG                      | CAGTTTCCACAGCACCGAGA                     |                                             |                          |
| 1810053B23Rik-RT               | CTTCACTCTGGGATGACCTTCTCTC               | CCTTATGTTTGGAGGTTGGCAT                   |                                             |                          |
| Cebpa-P-ChIP                   | TTGCGCCACGATCTCTCTCCAC                  | TTTATAGAGGTCGGGATCGCC                    |                                             |                          |
| Cebpa-Enh1-ChIP                | CCAAGCTGTCTTCC TGCTGCTTC                | GTATAGAGAGGAAACAGATGACC                  |                                             |                          |
| Cebpa-Enh3-ChIP                | CCGTTGAGAAAGAGGAGTCTG                   | GATAGCATCGGATTTGGTGTAG                   |                                             |                          |
| Gata2-P-ChIP                   | CGGGCTCTCGTGGTCTCTACTC                  | CCACAGATTCCTCCACACTAG                    |                                             |                          |
| Gata2-Enh1-ChIP                | TGTTCTCAGATGCTGCAGTCC                   | GATAGATGTTTGGTCAAGT                      |                                             |                          |
| Gata2-Enh2-ChIP                | CGCGACTACCACTTATGCTTCC                  | TCCGGCATGGCAGTTGSTGAG                    |                                             |                          |
| Gata2-Enh3-ChIP                | CGCCAGGTTGTGTGACTTTGG                   | ATGGTCCCATGGGAGCGAGCA                    |                                             |                          |
| Gata1-P-ChIP                   | CCCTTGTCTTGGCTCTGTGGAG                  | GCATACAGTCCAAACCCACATAG                  |                                             |                          |
| Gata1-Enh1-ChIP                | AAGGGCTCAGTAAAGAAATGAAGG                | CTGATTCCTTATCTATGCTTCT                   |                                             |                          |
| Gata1-Enh2-ChIP                | ACTGGAGTTAAGGATGGTGGGAGC                | CCTAAGTGTGGGCAACCTC                      |                                             |                          |
| Runx1-P1-ChIP                  | AAAGCCTTGGTGTGATTCAGTGT                 | CAA TGCGCTGGGCTGGAAG                     |                                             |                          |
| Runx1-Enh1-ChIP                | TTCTCAGAGAGTGTCTGATC                    | AGACCCAGCAACCTCTGGAG                     |                                             |                          |
| Runx1-Enh2-ChIP                | CGATGAGGAGTGTGTGGAGG                    | GATGGAGCATCCTGTTTCTC                     |                                             |                          |
| Runx1-Enh3-ChIP                | AGAGCAGAAAGAACTCAGAAGCGAG               | AAATGCTGCTGCTGAAGATC                     |                                             |                          |
| rTA-A                          | AAAGTGCCTCTGATTTGTTAT                   |                                          |                                             | Mouse genotyping primers |
| rTA-B                          | GCGAAGAGTTTGTCTCAACC                    |                                          |                                             |                          |
| rTA-C                          | GGAGCGGGAGAAATGGATATG                   |                                          |                                             |                          |
| dCas9-KRAB-A                   | GCACAGATTCGGCAGATC                      |                                          |                                             |                          |
| dCas9-KRAB-B                   | CCCTCACTGTGTGACCAAGG                    |                                          |                                             |                          |
| dCas9-KRAB-C                   | GCAGAAAGCCCGCTCTGG                      |                                          |                                             |                          |
| TAL1-WT-ChIP                   | GAAGCAGAGTAAAGAGATGATAAG                | TC TGCCAGGAAGTGGTTTACCTG                 |                                             |                          |
| TAL1-Mut-ChIP                  | GAAGCAGAGTAAAGAGATGATAAG                | AGTAGGTTTACGTTTCTCTAAC                   |                                             |                          |
| gDNA-sgRNA-NGS-LCreadoutPRC1-F | AATGGACTATCATATGCTTACCCTAAGTAAAGTATTTCC | AAAAAAAGcagcagctgggtgctactggccctGGCAGACA |                                             |                          |

|                   |                                                                                                   |  |
|-------------------|---------------------------------------------------------------------------------------------------|--|
| sgRNApool_NGS_F1  | AATGATACGGCGACCACCGAGATCTACACTCTTTCCCTACACGACGCTCTCCGATCTAAGTAGAGctttggaaggacgaacacccg            |  |
| sgRNApool_NGS_F2  | AATGATACGGCGACCACCGAGATCTACACTCTTTCCCTACACGACGCTCTCCGATCT#ACACGATCctttggaaggacgaacacccg           |  |
| sgRNApool_NGS_F3  | AATGATACGGCGACCACCGAGATCTACACTCTTTCCCTACACGACGCTCTCCGATCT#atCGCGCGTctttggaaggacgaacacccg          |  |
| sgRNApool_NGS_F4  | AATGATACGGCGACCACCGAGATCTACACTCTTTCCCTACACGACGCTCTCCGATCTcgaatCATGATCctttggaaggacgaacacccg        |  |
| sgRNApool_NGS_F5  | AATGATACGGCGACCACCGAGATCTACACTCTTTCCCTACACGACGCTCTCCGATCTcgaatCGTTACCctttggaaggacgaacacccg        |  |
| sgRNApool_NGS_F6  | AATGATACGGCGACCACCGAGATCTACACTCTTTCCCTACACGACGCTCTCCGATCT#acgaatTCCTTGGTctttggaaggacgaacacccg     |  |
| sgRNApool_NGS_F7  | AATGATACGGCGACCACCGAGATCTACACTCTTTCCCTACACGACGCTCTCCGATCT#atcgatAACGCATTctttggaaggacgaacacccg     |  |
| sgRNApool_NGS_F8  | AATGATACGGCGACCACCGAGATCTACACTCTTTCCCTACACGACGCTCTCCGATCTacgaatcgaatACAGGATCctttggaaggacgaacacccg |  |
| sgRNApool_NGS_F9  | AATGATACGGCGACCACCGAGATCTACACTCTTTCCCTACACGACGCTCTCCGATCTacgaatcgaatAGGTAAGGctttggaaggacgaacacccg |  |
| sgRNApool_NGS_F10 | AATGATACGGCGACCACCGAGATCTACACTCTTTCCCTACACGACGCTCTCCGATCT#AACAAATGGctttggaaggacgaacacccg          |  |
| sgRNApool_NGS_F11 | AATGATACGGCGACCACCGAGATCTACACTCTTTCCCTACACGACGCTCTCCGATCT#ACTGTATCctttggaaggacgaacacccg           |  |
| sgRNApool_NGS_F12 | AATGATACGGCGACCACCGAGATCTACACTCTTTCCCTACACGACGCTCTCCGATCT#atAGGTCCACTctttggaaggacgaacacccg        |  |
| PMLS_POOL_NGS_R1  | CAAGCAGAAAGCGGCATACGAGATACGAGATGCTGACTGGAGTTTCAGACGTGTGCTCTTCCGATCTcgaatTCGGTGCCACTTGGCCCTGCAGACA |  |
| PMLS_POOL_NGS_R2  | CAAGCAGAAAGCGGCATACGAGATACGAGATGCTGACTGGAGTTTCAGACGTGTGCTCTTCCGATCT#atTCGGTGCCACTTGGCCCTGCAGACA   |  |
| PMLS_POOL_NGS_R3  | CAAGCAGAAAGCGGCATACGAGATACGAGATGCTGACTGGAGTTTCAGACGTGTGCTCTTCCGATCT#atTCGGTGCCACTTGGCCCTGCAGACA   |  |
| PMLS_POOL_NGS_R4  | CAAGCAGAAAGCGGCATACGAGATGCTGACTGGAGTTTCAGACGTGTGCTCTTCCGATCTcgaatTCGGTGCCACTTGGCCCTGCAGACA        |  |
| PMLS_POOL_NGS_R5  | CAAGCAGAAAGCGGCATACGAGATGCTGACTGGAGTTTCAGACGTGTGCTCTTCCGATCTcgaatTCGGTGCCACTTGGCCCTGCAGACA        |  |
| PMLS_POOL_NGS_R6  | CAAGCAGAAAGCGGCATACGAGATGCTGACTGGAGTTTCAGACGTGTGCTCTTCCGATCTcgaatTCGGTGCCACTTGGCCCTGCAGACA        |  |

sgRNA pooled screen primers with barcodes and staggers
