# Supplementary material for: Interrogation of enhancer function by enhancer-targeting CRISPR epigenetic editing
Source: PubMed Central journal article supplement (PMC6981169; doi:10.1038/s41467-020-14362-5), 2020-01-24
Supplement: 41467_2020_14362_MOESM3_ESM.pdf [file 41467_2020_14362_MOESM3_ESM.pdf]

## Reporting Summary

Nature Research wishes to improve the reproducibility of the work that we publish. This form provides structure for consistency and transparency in reporting. For further information on Nature Research policies, see [Authors & Referees](#) and the [Editorial Policy Checklist](#).

### Statistics

For all statistical analyses, confirm that the following items are present in the figure legend, table legend, main text, or Methods section.

n/a Confirmed

- |                                     |                                     |                                                                                                                                                                                                                                                            |
|-------------------------------------|-------------------------------------|------------------------------------------------------------------------------------------------------------------------------------------------------------------------------------------------------------------------------------------------------------|
| <input type="checkbox"/>            | <input checked="" type="checkbox"/> | The exact sample size ( $n$ ) for each experimental group/condition, given as a discrete number and unit of measurement                                                                                                                                    |
| <input type="checkbox"/>            | <input checked="" type="checkbox"/> | A statement on whether measurements were taken from distinct samples or whether the same sample was measured repeatedly                                                                                                                                    |
| <input type="checkbox"/>            | <input checked="" type="checkbox"/> | The statistical test(s) used AND whether they are one- or two-sided<br><i>Only common tests should be described solely by name; describe more complex techniques in the Methods section.</i>                                                               |
| <input checked="" type="checkbox"/> | <input type="checkbox"/>            | A description of all covariates tested                                                                                                                                                                                                                     |
| <input type="checkbox"/>            | <input checked="" type="checkbox"/> | A description of any assumptions or corrections, such as tests of normality and adjustment for multiple comparisons                                                                                                                                        |
| <input type="checkbox"/>            | <input checked="" type="checkbox"/> | A full description of the statistical parameters including central tendency (e.g. means) or other basic estimates (e.g. regression coefficient) AND variation (e.g. standard deviation) or associated estimates of uncertainty (e.g. confidence intervals) |
| <input checked="" type="checkbox"/> | <input type="checkbox"/>            | For null hypothesis testing, the test statistic (e.g. $F$ , $t$ , $r$ ) with confidence intervals, effect sizes, degrees of freedom and $P$ value noted<br><i>Give <math>P</math> values as exact values whenever suitable.</i>                            |
| <input checked="" type="checkbox"/> | <input type="checkbox"/>            | For Bayesian analysis, information on the choice of priors and Markov chain Monte Carlo settings                                                                                                                                                           |
| <input checked="" type="checkbox"/> | <input type="checkbox"/>            | For hierarchical and complex designs, identification of the appropriate level for tests and full reporting of outcomes                                                                                                                                     |
| <input checked="" type="checkbox"/> | <input type="checkbox"/>            | Estimates of effect sizes (e.g. Cohen's $d$ , Pearson's $r$ ), indicating how they were calculated                                                                                                                                                         |

*Our web collection on [statistics for biologists](#) contains articles on many of the points above.*

### Software and code

Policy information about [availability of computer code](#)

Data collection

No software was used.

Data analysis

MACS version 2: for ChIP-seq peak calling  
Bowtie version 2.1.0: for alignment  
STAR 2.5.2b: for RNA-seq read alignment  
RSEM: for calculation of normalized gene expression  
DESeq2: for differential gene expression analysis  
MANorm: for comparison of ChIP-seq signal intensities in different samples

For manuscripts utilizing custom algorithms or software that are central to the research but not yet described in published literature, software must be made available to editors/reviewers. We strongly encourage code deposition in a community repository (e.g. GitHub). See the Nature Research [guidelines for submitting code & software](#) for further information.

### Data

Policy information about [availability of data](#)

All manuscripts must include a [data availability statement](#). This statement should provide the following information, where applicable:

- Accession codes, unique identifiers, or web links for publicly available datasets
- A list of figures that have associated raw data
- A description of any restrictions on data availability

All raw and processed ATAC-seq, ChIP-seq and RNA-seq data are available in the Gene Expression Omnibus (GEO): GSE132216

## Field-specific reporting

Please select the one below that is the best fit for your research. If you are not sure, read the appropriate sections before making your selection.

- Life sciences       Behavioural & social sciences       Ecological, evolutionary & environmental sciences

For a reference copy of the document with all sections, see [nature.com/documents/nr-reporting-summary-flat.pdf](https://www.nature.com/documents/nr-reporting-summary-flat.pdf)

## Life sciences study design

All studies must disclose on these points even when the disclosure is negative.

|                 |                                                                                                                                                                                                                                                                                                                                                                                                                                                                                                                                                                                                                                                                                                                                                                                                                                                                                                                                                                                                                                                                                                                                                                                                                                                                                                                                                                                                                                                                                                                                                              |
|-----------------|--------------------------------------------------------------------------------------------------------------------------------------------------------------------------------------------------------------------------------------------------------------------------------------------------------------------------------------------------------------------------------------------------------------------------------------------------------------------------------------------------------------------------------------------------------------------------------------------------------------------------------------------------------------------------------------------------------------------------------------------------------------------------------------------------------------------------------------------------------------------------------------------------------------------------------------------------------------------------------------------------------------------------------------------------------------------------------------------------------------------------------------------------------------------------------------------------------------------------------------------------------------------------------------------------------------------------------------------------------------------------------------------------------------------------------------------------------------------------------------------------------------------------------------------------------------|
| Sample size     | A sample size of 3 (for locus-specific perturbations) or 15 (for multi-loci perturbations) recipient mice was selected for in vivo enCRISPRi perturbation screens. A sample size of two independent replicate screens were performed. A sample size of two independent replicates was performed for ChIP-seq and RNA-seq experiments following enCRISPRi or enCRISPRa. These sample sizes were selected because multiple statistical approaches have been developed to allow identification of significantly changed genes or genomic loci from two or more biological replicates of high-throughput sequencing data (e.g. edgeR, DEseq2). These approaches work by using all measured genes or loci to analyze and model the variance within and between replicates, thereby allowing the identification of genes/loci with significant differences between conditions.<br>A sample size of five mice were selected for xenograft experiments. A sample size of three biological replicates and two or three technical replicates was selected for cell growth assays. A sample size of two biological replicate experiments and two or three technical replicates was selected for qRT-PCR analyses. These sample sizes were selected to allow these experiments to be sufficiently powered such that differences between experimental groups will be statistically significant with type I error rates < 5% (e.g. $P < 0.05$ ) and with 80% power to detect a standardized difference. Wherever possible, additional biological replicates were included. |
| Data exclusions | All replicate data were used for statistical analysis and no data was excluded.                                                                                                                                                                                                                                                                                                                                                                                                                                                                                                                                                                                                                                                                                                                                                                                                                                                                                                                                                                                                                                                                                                                                                                                                                                                                                                                                                                                                                                                                              |
| Replication     | Three (for locus-specific perturbations) or fifteen (for multi-loci perturbations) recipient mice were performed for enCRISPRi perturbation screens. Two biological replicate screens were performed. Two biological replicate experiments and two or three technical replicates were performed for qRT-PCR analyses. Two biological replicates were performed for ChIP-seq and RNA-seq experiments. Replicate experiments yielded similar results.                                                                                                                                                                                                                                                                                                                                                                                                                                                                                                                                                                                                                                                                                                                                                                                                                                                                                                                                                                                                                                                                                                          |
| Randomization   | For xenograft experiments, recipient NSG mice were allocated randomly for the xenotransplantation of control or enCRISPRa expressing cells.                                                                                                                                                                                                                                                                                                                                                                                                                                                                                                                                                                                                                                                                                                                                                                                                                                                                                                                                                                                                                                                                                                                                                                                                                                                                                                                                                                                                                  |
| Blinding        | Blinding was not possible for the xenograft and in vivo CRE perturbation experiments because we would need to the genotype or sample information for the downstream measurements.                                                                                                                                                                                                                                                                                                                                                                                                                                                                                                                                                                                                                                                                                                                                                                                                                                                                                                                                                                                                                                                                                                                                                                                                                                                                                                                                                                            |

## Reporting for specific materials, systems and methods

We require information from authors about some types of materials, experimental systems and methods used in many studies. Here, indicate whether each material, system or method listed is relevant to your study. If you are not sure if a list item applies to your research, read the appropriate section before selecting a response.

| Materials & experimental systems    |                                                                 | Methods                             |                                                    |
|-------------------------------------|-----------------------------------------------------------------|-------------------------------------|----------------------------------------------------|
| n/a                                 | Involved in the study                                           | n/a                                 | Involved in the study                              |
| <input type="checkbox"/>            | <input checked="" type="checkbox"/> Antibodies                  | <input type="checkbox"/>            | <input checked="" type="checkbox"/> ChIP-seq       |
| <input type="checkbox"/>            | <input checked="" type="checkbox"/> Eukaryotic cell lines       | <input type="checkbox"/>            | <input checked="" type="checkbox"/> Flow cytometry |
| <input checked="" type="checkbox"/> | <input type="checkbox"/> Palaeontology                          | <input checked="" type="checkbox"/> | <input type="checkbox"/> MRI-based neuroimaging    |
| <input type="checkbox"/>            | <input checked="" type="checkbox"/> Animals and other organisms |                                     |                                                    |
| <input checked="" type="checkbox"/> | <input type="checkbox"/> Human research participants            |                                     |                                                    |
| <input checked="" type="checkbox"/> | <input type="checkbox"/> Clinical data                          |                                     |                                                    |

## Antibodies

|                 |                                                                                                                                                                                                                                                                                                                                                                                                                                                                                                                     |
|-----------------|---------------------------------------------------------------------------------------------------------------------------------------------------------------------------------------------------------------------------------------------------------------------------------------------------------------------------------------------------------------------------------------------------------------------------------------------------------------------------------------------------------------------|
| Antibodies used | H3K27ac, Abcam Cat# ab4729; RRID:AB_2118291<br>H3K4me1, Abcam Cat# ab8895; RRID:AB_306847<br>H3K4me2, Millipore Cat# 07-030 RRID:AB_10099880<br>H3K9me3, Abcam Cat# ab8898; RRID:AB_306848<br>H3K27me3, Millipore, Cat# 07-449 RRID:AB_310624<br>GATA1, Abcam Cat# ab11852; RRID:AB_298635<br>TAL1, Santa Cruz Biotechnology Cat# sc-12984; RRID:AB_2199699<br>CTCF, Millipore Cat# 07-729; RRID:AB_441965<br>HA, Santa Cruz Biotechnology Cat# sc-805; RRID:AB_631618<br>Cas9, Abcam Cat# ab191468 RRID:AB_2692325 |
|-----------------|---------------------------------------------------------------------------------------------------------------------------------------------------------------------------------------------------------------------------------------------------------------------------------------------------------------------------------------------------------------------------------------------------------------------------------------------------------------------------------------------------------------------|

b-tubulin, Cell Signaling Technology, Cat#2128 RRID:AB\_823664

#### Validation

All antibodies were commercially available, suitable for ChIP-seq and/or Western blot in human or mouse cells as specified by the manufacturers.

## Eukaryotic cell lines

Policy information about [cell lines](#)

#### Cell line source(s)

Human Jurkat cell line, ATCC Cat# TIB-152; RRID:CVCL\_0367  
Human HEK293T cell line, ATCC Cat#CRL-3216; RRID:CVCL\_0063:  
Human K562 cell line, ATCC Cat# CCL-243; RRID:CVCL\_0004

#### Authentication

To ensure the identity and validity of these cell lines, we perform qRT-PCR and Western Blot analyses of several leukemia signature genes (e.g. the 17-gene signature from Ng et al., 2016 Nature 540:433-437). We also performed RNA-seq and whole genome sequencing (WGS) and compared with the results in previous studies.

#### Mycoplasma contamination

All cell lines were tested negative for mycoplasma contamination.

#### Commonly misidentified lines (See [ICLAC](#) register)

No cell lines used in this study were found in the database of commonly misidentified cell lines that are maintained by ICLAC and NCBI BioSample.

## Animals and other organisms

Policy information about [studies involving animals](#); [ARRIVE guidelines](#) recommended for reporting animal research

#### Laboratory animals

NOD-SCID (NSG) mice were purchased from and maintained at the animal core facility of University of Texas Southwestern Medical Center (UTSW).

#### Wild animals

Study did not involve wild animals.

#### Field-collected samples

Study did not involve field-collected samples.

#### Ethics oversight

Animal work described in this manuscript has been approved and conducted under the oversight of the UT Southwestern Institutional Animal Care and Use Committee (IACUC) under the protocol APN 2017-102220.

Note that full information on the approval of the study protocol must also be provided in the manuscript.

## ChIP-seq

### Data deposition

Confirm that both raw and final processed data have been deposited in a public database such as [GEO](#).

Confirm that you have deposited or provided access to graph files (e.g. BED files) for the called peaks.

#### Data access links

*May remain private before publication.*

<https://www.ncbi.nlm.nih.gov/geo/query/acc.cgi?acc=GSE132216>

#### Files in database submission

GSM3854054 ChIP-seq\_Jurkat-H3K27ac  
GSM3854055 ChIP-seq\_293T\_enCRISPRa\_sgGal4\_HA\_rep1  
GSM3854056 ChIP-seq\_293T\_enCRISPRa\_sgGal4\_HA\_rep2  
GSM3854057 ChIP-seq\_293T\_enCRISPRa\_sgHS2\_HA\_rep1  
GSM3854058 ChIP-seq\_293T\_enCRISPRa\_sgHS2\_HA\_rep2  
GSM3854059 ChIP-seq\_K562\_enCRISPRi-LK\_sgGal4\_HA\_rep1  
GSM3854060 ChIP-seq\_K562\_enCRISPRi-LK\_sgGal4\_HA\_rep2  
GSM3854061 ChIP-seq\_K562\_enCRISPRi-LK\_sgHS2\_HA\_rep1  
GSM3854062 ChIP-seq\_K562\_enCRISPRi-LK\_sgHS2\_HA\_rep2  
GSM3854063 ChIP-seq\_K562\_dCas9-KRAB\_sgHS2\_cas9\_rep1  
GSM3854064 ChIP-seq\_K562\_dCas9-KRAB\_sgHS2\_cas9\_rep2  
GSM3854065 ChIP-seq\_K562\_dCas9-KRAB\_sgHS2\_CTCF\_rep1  
GSM3854066 ChIP-seq\_K562\_dCas9-KRAB\_sgHS2\_CTCF\_rep2  
GSM3854067 ChIP-seq\_K562\_dCas9-KRAB\_sgHS2\_GATA1\_rep1  
GSM3854068 ChIP-seq\_K562\_dCas9-KRAB\_sgHS2\_GATA1\_rep2  
GSM3854069 ChIP-seq\_K562\_dCas9-KRAB\_sgHS2\_H3K27ac\_rep1  
GSM3854070 ChIP-seq\_K562\_dCas9-KRAB\_sgHS2\_H3K27ac\_rep2  
GSM3854071 ChIP-seq\_K562\_dCas9-KRAB\_sgHS2\_H3K4me2\_rep1  
GSM3854072 ChIP-seq\_K562\_dCas9-KRAB\_sgHS2\_H3K4me2\_rep2  
GSM3854073 ChIP-seq\_K562\_dCas9-KRAB\_sgHS2\_H3K4me\_rep1  
GSM3854074 ChIP-seq\_K562\_dCas9-KRAB\_sgHS2\_H3K4me\_rep2

GSM3854075 ChIP-seq\_K562\_dCas9-KRAB\_sgHS2\_H3K9me3\_rep1  
GSM3854076 ChIP-seq\_K562\_dCas9-KRAB\_sgHS2\_H3K9me3\_rep2  
GSM3854077 ChIP-seq\_K562\_dCas9-KRAB\_sgHS2\_TAL1\_rep1  
GSM3854078 ChIP-seq\_K562\_dCas9-KRAB\_sgHS2\_TAL1\_rep2  
GSM3854079 ChIP-seq\_K562\_dCas9-LSD1\_sgHS2\_cas9\_rep1  
GSM3854080 ChIP-seq\_K562\_dCas9-LSD1\_sgHS2\_cas9\_rep2  
GSM3854081 ChIP-seq\_K562\_dCas9-LSD1\_sgHS2\_CTCF\_rep1  
GSM3854082 ChIP-seq\_K562\_dCas9-LSD1\_sgHS2\_CTCF\_rep2  
GSM3854083 ChIP-seq\_K562\_dCas9-LSD1\_sgHS2\_GATA1\_rep1  
GSM3854084 ChIP-seq\_K562\_dCas9-LSD1\_sgHS2\_GATA1\_rep2  
GSM3854085 ChIP-seq\_K562\_dCas9-LSD1\_sgHS2\_H3K27ac\_rep1  
GSM3854086 ChIP-seq\_K562\_dCas9-LSD1\_sgHS2\_H3K27ac\_rep2  
GSM3854087 ChIP-seq\_K562\_dCas9-LSD1\_sgHS2\_H3K4me2\_rep1  
GSM3854088 ChIP-seq\_K562\_dCas9-LSD1\_sgHS2\_H3K4me2\_rep2  
GSM3854089 ChIP-seq\_K562\_dCas9-LSD1\_sgHS2\_H3K4me\_rep1  
GSM3854090 ChIP-seq\_K562\_dCas9-LSD1\_sgHS2\_H3K4me\_rep2  
GSM3854091 ChIP-seq\_K562\_dCas9-LSD1\_sgHS2\_H3K9me3\_rep1  
GSM3854092 ChIP-seq\_K562\_dCas9-LSD1\_sgHS2\_H3K9me3\_rep2  
GSM3854093 ChIP-seq\_K562\_dCas9-LSD1\_sgHS2\_TAL1\_rep1  
GSM3854094 ChIP-seq\_K562\_dCas9-LSD1\_sgHS2\_TAL1\_rep2  
GSM3854095 ChIP-seq\_K562\_enCRISPRi-KL\_sgHS2\_cas9\_rep1  
GSM3854096 ChIP-seq\_K562\_enCRISPRi-KL\_sgHS2\_cas9\_rep2  
GSM3854097 ChIP-seq\_K562\_enCRISPRi-KL\_sgHS2\_CTCF\_rep1  
GSM3854098 ChIP-seq\_K562\_enCRISPRi-KL\_sgHS2\_CTCF\_rep2  
GSM3854099 ChIP-seq\_K562\_enCRISPRi-KL\_sgHS2\_GATA1\_rep1  
GSM3854100 ChIP-seq\_K562\_enCRISPRi-KL\_sgHS2\_GATA1\_rep2  
GSM3854101 ChIP-seq\_K562\_enCRISPRi-KL\_sgHS2\_H3K27ac\_rep1  
GSM3854102 ChIP-seq\_K562\_enCRISPRi-KL\_sgHS2\_H3K27ac\_rep2  
GSM3854103 ChIP-seq\_K562\_enCRISPRi-KL\_sgHS2\_H3K4me2\_rep1  
GSM3854104 ChIP-seq\_K562\_enCRISPRi-KL\_sgHS2\_H3K4me2\_rep2  
GSM3854105 ChIP-seq\_K562\_enCRISPRi-KL\_sgHS2\_H3K4me\_rep1  
GSM3854106 ChIP-seq\_K562\_enCRISPRi-KL\_sgHS2\_H3K4me\_rep2  
GSM3854107 ChIP-seq\_K562\_enCRISPRi-KL\_sgHS2\_H3K9me3\_rep1  
GSM3854108 ChIP-seq\_K562\_enCRISPRi-KL\_sgHS2\_H3K9me3\_rep2  
GSM3854109 ChIP-seq\_K562\_enCRISPRi-KL\_sgHS2\_TAL1\_rep1  
GSM3854110 ChIP-seq\_K562\_enCRISPRi-KL\_sgHS2\_TAL1\_rep2  
GSM3854111 ChIP-seq\_K562\_enCRISPRi-LK\_sgHS2\_cas9\_rep1  
GSM3854112 ChIP-seq\_K562\_enCRISPRi-LK\_sgHS2\_cas9\_rep2  
GSM3854113 ChIP-seq\_K562\_enCRISPRi-LK\_sgHS2\_CTCF\_rep1  
GSM3854114 ChIP-seq\_K562\_enCRISPRi-LK\_sgHS2\_CTCF\_rep2  
GSM3854115 ChIP-seq\_K562\_enCRISPRi-LK\_sgHS2\_GATA1\_rep1  
GSM3854116 ChIP-seq\_K562\_enCRISPRi-LK\_sgHS2\_GATA1\_rep2  
GSM3854117 ChIP-seq\_K562\_enCRISPRi-LK\_sgHS2\_H3K27ac\_rep1  
GSM3854118 ChIP-seq\_K562\_enCRISPRi-LK\_sgHS2\_H3K27ac\_rep2  
GSM3854119 ChIP-seq\_K562\_enCRISPRi-LK\_sgHS2\_H3K4me2\_rep1  
GSM3854120 ChIP-seq\_K562\_enCRISPRi-LK\_sgHS2\_H3K4me2\_rep2  
GSM3854121 ChIP-seq\_K562\_enCRISPRi-LK\_sgHS2\_H3K4me\_rep1  
GSM3854122 ChIP-seq\_K562\_enCRISPRi-LK\_sgHS2\_H3K4me\_rep2  
GSM3854123 ChIP-seq\_K562\_enCRISPRi-LK\_sgHS2\_H3K9me3\_rep1  
GSM3854124 ChIP-seq\_K562\_enCRISPRi-LK\_sgHS2\_H3K9me3\_rep2  
GSM3854125 ChIP-seq\_K562\_enCRISPRi-LK\_sgHS2\_TAL1\_rep1  
GSM3854126 ChIP-seq\_K562\_enCRISPRi-LK\_sgHS2\_TAL1\_rep2  
GSM3854127 ChIP-seq\_K562\_sgGal4\_Cas9\_rep1  
GSM3854128 ChIP-seq\_K562\_sgGal4\_Cas9\_rep2  
GSM3854129 ChIP-seq\_K562\_sgGal4\_CTCF\_rep1  
GSM3854130 ChIP-seq\_K562\_sgGal4\_CTCF\_rep2  
GSM3854131 ChIP-seq\_K562\_sgGal4\_GATA1\_rep1  
GSM3854132 ChIP-seq\_K562\_sgGal4\_GATA1\_rep2  
GSM3854133 ChIP-seq\_K562\_sgGal4\_H3K27ac\_rep1  
GSM3854134 ChIP-seq\_K562\_sgGal4\_H3K27ac\_rep2  
GSM3854135 ChIP-seq\_K562\_sgGal4\_H3K4me2\_rep1  
GSM3854136 ChIP-seq\_K562\_sgGal4\_H3K4me2\_rep2  
GSM3854137 ChIP-seq\_K562\_sgGal4\_H3K4me\_rep1  
GSM3854138 ChIP-seq\_K562\_sgGal4\_H3K4me\_rep2  
GSM3854139 ChIP-seq\_K562\_sgGal4\_H3K9me3\_rep1  
GSM3854140 ChIP-seq\_K562\_sgGal4\_H3K9me3\_rep2  
GSM3854141 ChIP-seq\_K562\_sgGal4\_TAL1\_rep1  
GSM3854142 ChIP-seq\_K562\_sgGal4\_TAL1\_rep2

GSM4190316 ChIP-seq\_K562\_dCas9-KRAB\_sgHS2\_H3K27me3\_rep1  
 GSM4190317 ChIP-seq\_K562\_dCas9-KRAB\_sgHS2\_H3K27me3\_rep2  
 GSM4190318 ChIP-seq\_K562\_dCas9-LSD1\_sgHS2\_H3K27me3\_rep1  
 GSM4190319 ChIP-seq\_K562\_dCas9-LSD1\_sgHS2\_H3K27me3\_rep2  
 GSM4190320 ChIP-seq\_K562\_enCRISPRi-KL\_sgHS2\_H3K27me3\_rep1  
 GSM4190321 ChIP-seq\_K562\_enCRISPRi-KL\_sgHS2\_H3K27me3\_rep2  
 GSM4190322 ChIP-seq\_K562\_enCRISPRi-LK\_sgHS2\_H3K27me3\_rep1  
 GSM4190323 ChIP-seq\_K562\_enCRISPRi-LK\_sgHS2\_H3K27me3\_rep2  
 GSM4190324 ChIP-seq\_K562\_sgGal4\_H3K27me3\_rep1  
 GSM4190325 ChIP-seq\_K562\_sgGal4\_H3K27me3\_rep2  
 GSM3854143 RNA-seq\_K562\_dCas9-KRAB\_sgHS2\_rep1  
 GSM3854144 RNA-seq\_K562\_dCas9-KRAB\_sgHS2\_rep2  
 GSM3854145 RNA-seq\_K562\_dCas9-LSD1\_sgHS2\_rep1  
 GSM3854146 RNA-seq\_K562\_dCas9-LSD1\_sgHS2\_rep2  
 GSM3854147 RNA-seq\_K562\_enCRISPRi-KL\_sgHS2\_rep1  
 GSM3854148 RNA-seq\_K562\_enCRISPRi-KL\_sgHS2\_rep2  
 GSM3854149 RNA-seq\_K562\_enCRISPRi-LK\_sgHS2\_rep1  
 GSM3854150 RNA-seq\_K562\_enCRISPRi-LK\_sgHS2\_rep2  
 GSM3854151 RNA-seq\_K562\_sgGal4\_rep1  
 GSM3854152 RNA-seq\_K562\_sgGal4\_rep2  
 GSM3854041 ATAC-seq\_Jurkat

Genome browser session  
 (e.g. [UCSC](#))

N/A

## Methodology

Replicates

See Supplementary Table 1. Two replicate experiments were performed for ChIP-seq experiments following enCRISPRi. The replicates closely agree when assessed by peak overlap, clustering analysis with input control or ChIP-seq data for other factors, or motif enrichment analysis.

Sequencing depth

See detailed information of the deposited datasets in GEO (accession #GSE132216).

Antibodies

H3K27ac, Abcam Cat# ab4729; RRID:AB\_2118291  
 H3K4me1, Abcam Cat# ab8895; RRID:AB\_306847  
 H3K4me2, Millipore Cat# 07-030 RRID:AB\_10099880  
 H3K9me3, Abcam Cat# ab8898; RRID:AB\_306848  
 H3K27me3, Millipore, Cat# 07-449 RRID:AB\_310624  
 GATA1, Abcam Cat# ab11852; RRID:AB\_298635  
 TAL1, Santa Cruz Biotechnology Cat# sc-12984; RRID:AB\_2199699  
 CTCF, Millipore Cat# 07-729; RRID:AB\_441965  
 HA, Santa Cruz Biotechnology Cat# sc-805; RRID:AB\_631618  
 Cas9, Abcam Cat# ab191468 RRID:AB\_2692325

Peak calling parameters

Peaks were identified by MACS version 2 with P value of 10e-5, and ranked by fold enrichment and P value in each dataset.

Data quality

Peaks were called at a P value of 10e-5. The replicate experiments closely agree when assessed by peak overlap, clustering analysis with input control or ChIP-seq data for other factors, or motif enrichment analysis.

Software

ChIP-seq raw reads were aligned to the human (hg19) genome assembly using Bowtie2 with  $-k$  1. Only tags that uniquely mapped to the genome were used for further analysis. Peaks were identified by MACS version 2 with P value of 10e-5, and ranked by fold enrichment and P value in each dataset.

## Flow Cytometry

### Plots

Confirm that:

- The axis labels state the marker and fluorochrome used (e.g. CD4-FITC).
- The axis scales are clearly visible. Include numbers along axes only for bottom left plot of group (a 'group' is an analysis of identical markers).
- All plots are contour plots with outliers or pseudocolor plots.
- A numerical value for number of cells or percentage (with statistics) is provided.

## Methodology

Sample preparation

BM cells were obtained by crushing femurs, tibias, vertebrae and pelvic bones with a mortar in Ca<sup>2+</sup> and Mg<sup>2+</sup>-free Hank's buffered salt solution (HBSS, Gibco) supplemented with 2% heat-inactivated bovine serum (HIBS, Gibco). Spleens were

|                           |                                                                                                                                                                                                                                                                                                                                                                                                                                            |
|---------------------------|--------------------------------------------------------------------------------------------------------------------------------------------------------------------------------------------------------------------------------------------------------------------------------------------------------------------------------------------------------------------------------------------------------------------------------------------|
|                           | dissociated by crushing followed by trituration. All BM and spleen cell suspensions were filtered through 70 µm cell strainers, followed by cell counting using a Vi-CELL cell viability analyser (Beckman Coulter).                                                                                                                                                                                                                       |
| Instrument                | FACSAria or FACSCanto flow cytometer (BD Biosciences)                                                                                                                                                                                                                                                                                                                                                                                      |
| Software                  | FACSDiva (BD Biosciences)                                                                                                                                                                                                                                                                                                                                                                                                                  |
| Cell population abundance | Variable between 10~50% depending on the cell populations (e.g. myeloid, T, or B lymphoid cells)                                                                                                                                                                                                                                                                                                                                           |
| Gating strategy           | Cells were incubated with combinations of fluorophore-conjugated antibodies. Lineage markers for HSCs and progenitors were CD2, CD3, CD5, CD8, B220, Gr1 and Ter119. Antibody staining was performed at 4°C for 30min or on ice for 90min. Biotinylated antibodies were visualized by incubation with PE/Cy7-conjugated streptavidin at 4°C for 30min. DAPI (4,6-diamidino-2-phenylindole; 2 µg/ml in PBS) was used to exclude dead cells. |

Tick this box to confirm that a figure exemplifying the gating strategy is provided in the Supplementary Information.
